# Supplementary material for: Truncated PARP1 mediates ADP-ribosylation of RNA polymerase III for apoptosis
Source: PubMed Central journal article supplement (PMC8764063; doi:10.1038/s41421-021-00355-1), 2022-01-18
Supplement: 41421_2021_355_MOESM1_ESM.pdf [file 41421_2021_355_MOESM1_ESM.pdf]

## **Supplementary Information**

### **Truncated PARP1 promotes RNA polymerase III during cytosolic DNA induced-apoptosis**

Qian Chen<sup>#\*</sup>, Kai Ma<sup>#</sup>, Xiuhua Liu, Shih-Hsun Chen, Peng Li, Yonghao Yu, Anthony K. L.

Leung, Xiaochun Yu\*

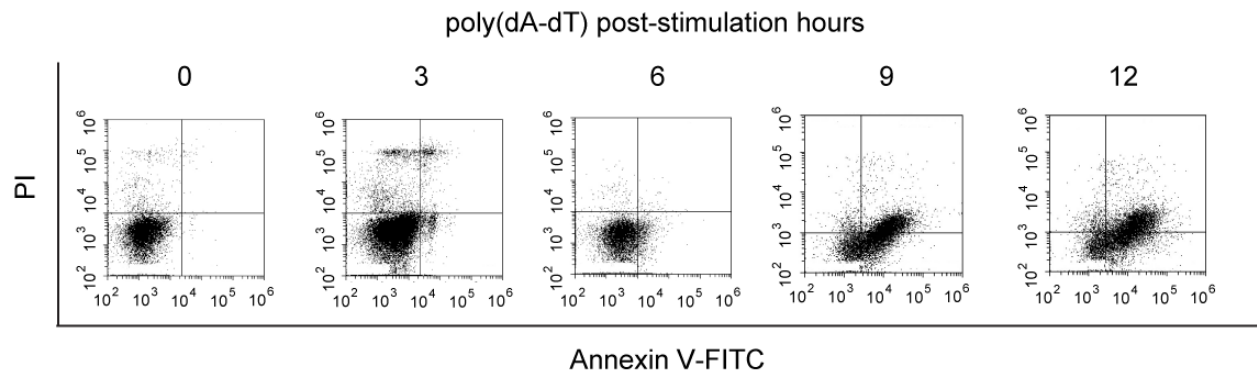

**Supplementary Fig. S1. The flow cytometry images of apoptosis-induced by 5  $\mu$ g/ml of poly(dA-dT) in U2OS cells.**

a

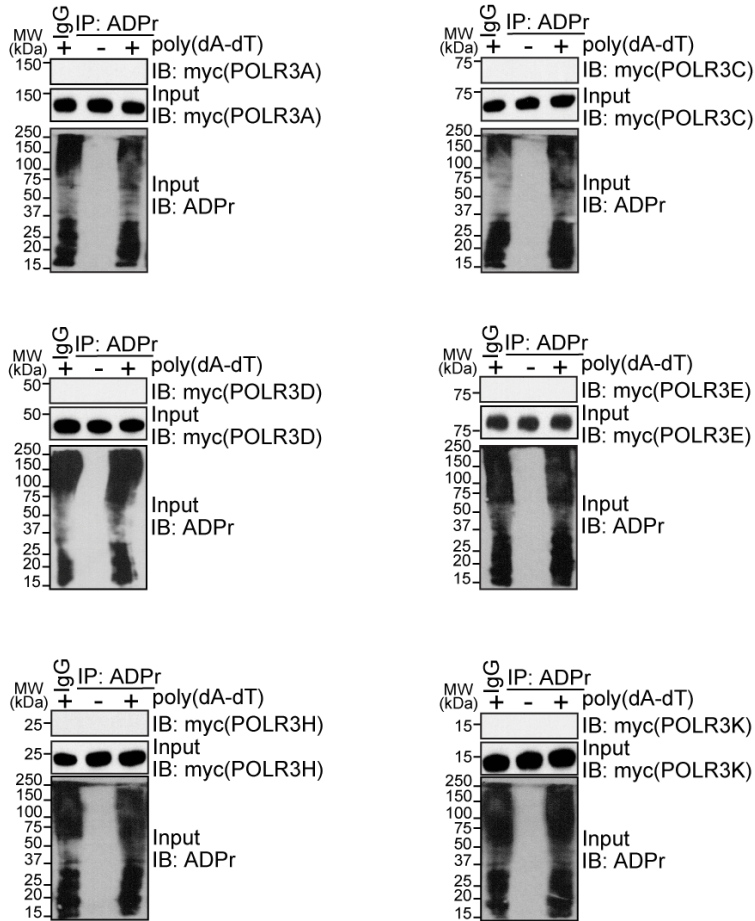

b

| Pol III subunit | MW(kDa) | Function            | ADP-ribosylation |
|-----------------|---------|---------------------|------------------|
| POLR3A          | 155.6   | Active complex      | -                |
| POLR3B          | 127.6   | Active complex      | +                |
| POLR3C          | 60.5    | Initiation complex  | -                |
| POLR3D          | 44.4    | Termination complex | -                |
| POLR3E          | 79.8    | Termination complex | -                |
| POLR3F          | 35.6    | Initiation complex  | +                |
| POLR3G          | 25.9    | Initiation complex  | +                |
| POLR3H          | 22.9    | Initiation complex  | -                |
| POLR3K          | 12.3    | Termination complex | -                |

**Supplementary Fig. S2. ADP-ribosylation of POLR3A, POLR3C, POLR3D, POLR3E,**

**POLR3H and POLR3K are not detectable during poly(dA-dT)-stimulated apoptosis. (a)**

Individual subunit of Pol III with a myc tag was expressed in the cells, followed by poly(dA-dT)-stimulated apoptosis (5  $\mu$ g/ml, six hours). IP and Western blot were performed with anti-ADP-ribose antibody and anti-myc antibody respectively. (b) Summary of the ADP-ribosylated RNA

Pol III subunits during the poly(dA-dT)-stimulated apoptosis.

a

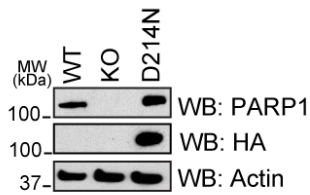

b

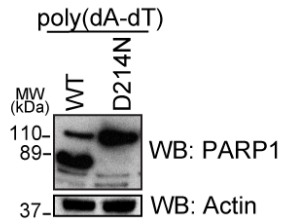

**Supplementary Fig. S3. The expression of caspase-resistant PARP1 (D214N) in PARP1-null cells.** (a) Indicated antibodies were used in the Western blot to confirm the expression of the D214N mutant of PARP1. (b) PARP1 cleavage was examined in the poly(dA-dT)-stimulated cells (5  $\mu$ g/ml, six hours). D214N could not be cut by caspases during apoptosis.

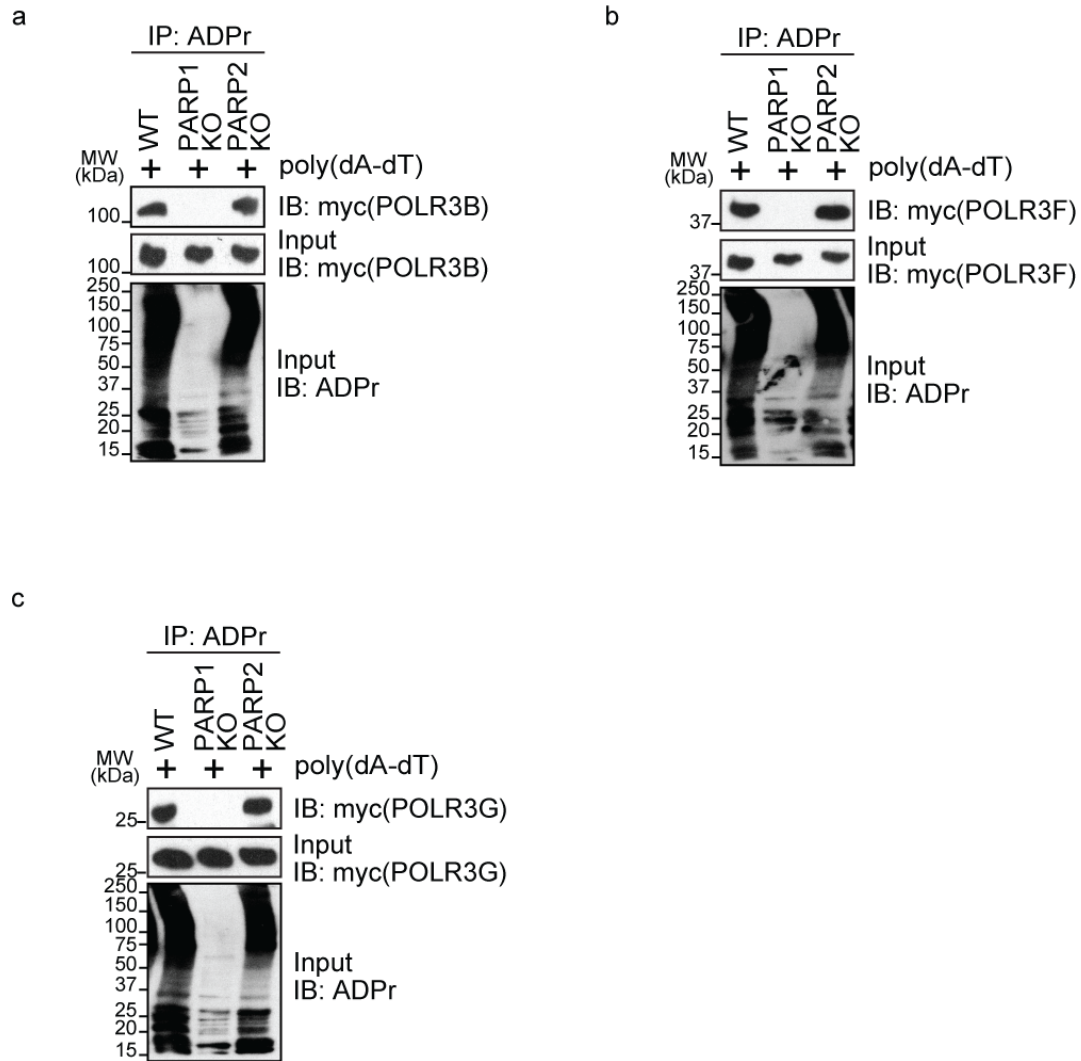

**Supplementary Fig. S4. PARP1 but not PARP2 is required for the ADP-ribosylation of Pol III during apoptosis.** (a, b and c) Myc-tagged Pol III B, F or G subunit was expressed in the wide type, PARP1-null or PARP2-null U2OS cells which were stimulated by 5  $\mu$ g/ml of poly(dA-dT) for six hours. The ADP-ribosylated Pol III was IPed with anti-ADPr antibody from the lysates of wide type, PARP1-null or PARP2-null cells and examined by Western blotting with anti-myc antibody.

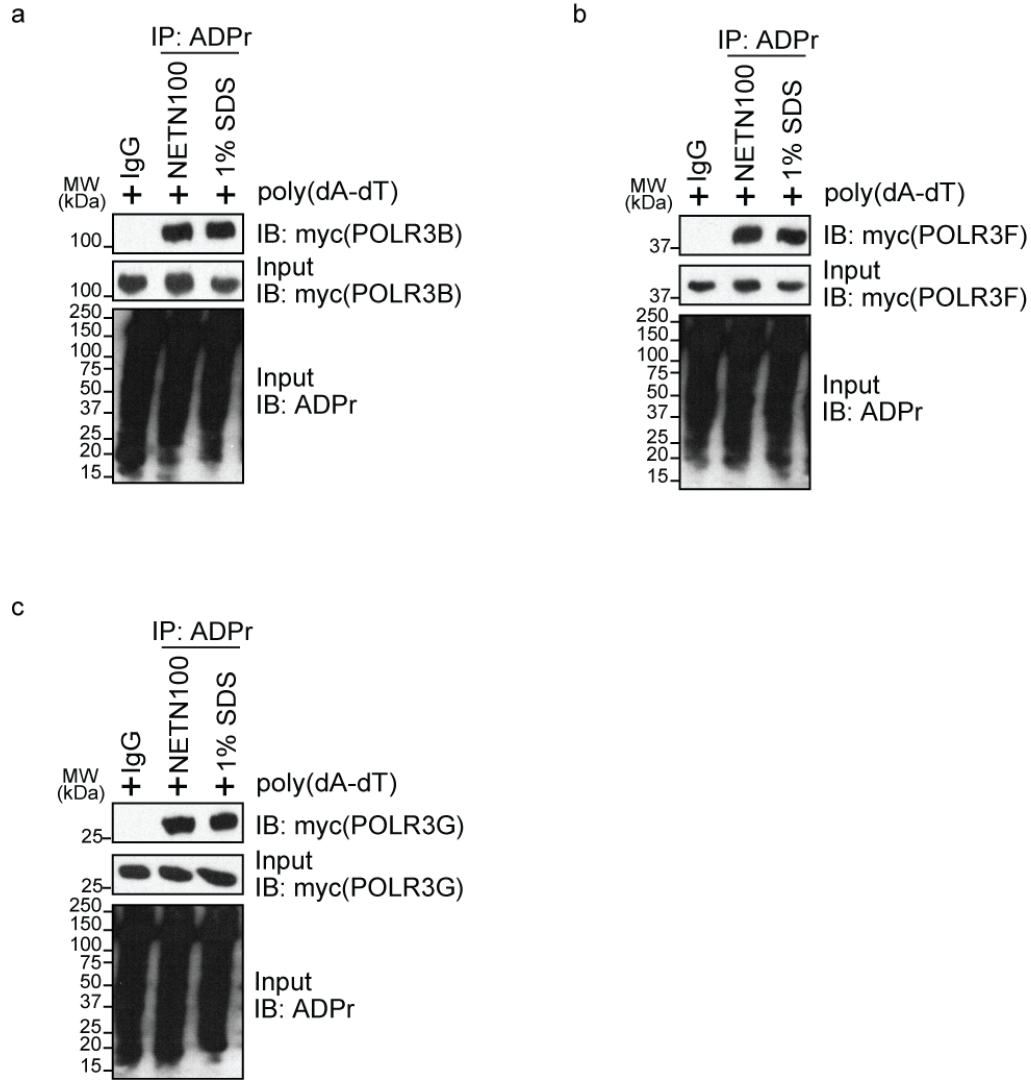

**Supplementary Fig. S5. ADP-ribosylation on Pol III is a covalent modification.** (a, b and c) Myc-tagged Pol III B, F or G subunit was expressed in the poly(dA-dT)-stimulated U2OS cells (5  $\mu$ g/ml, six hours), which were lysed by NETN100 buffer to retain non-covalent interaction in cell lysates or 1% SDS buffer to abolish non-covalent interaction in cell lysates. The samples were examined by IPed with anti-ADPr antibody and Western blotting with anti-myc antibody.

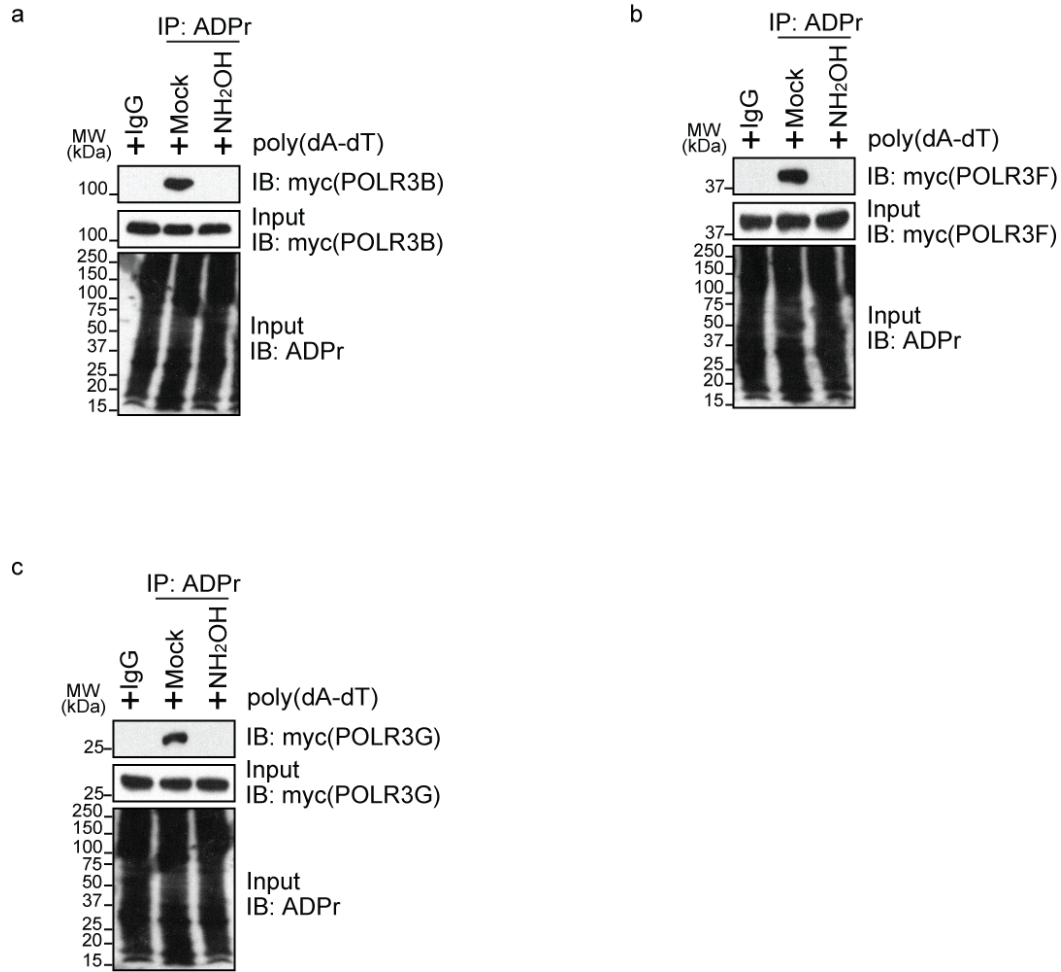

**Supplementary Fig. S6. Covalent ADP-ribosylation on Pol III is validated by NH<sub>2</sub>OH treatment.** (a, b and c) Myc-tagged Pol III B, F or G subunit was expressed in the poly(dA-dT)-stimulated U2OS cells (5  $\mu$ g/ml, six hours), which were lysed by NETN100 buffer. The ADP-ribosylated proteins were IPed with anti-ADPr antibody and followed by NH<sub>2</sub>OH treatment (0.5 M) to remove covalently linked ADPr, and the samples were further examined by Western blotting using anti-myc antibody.

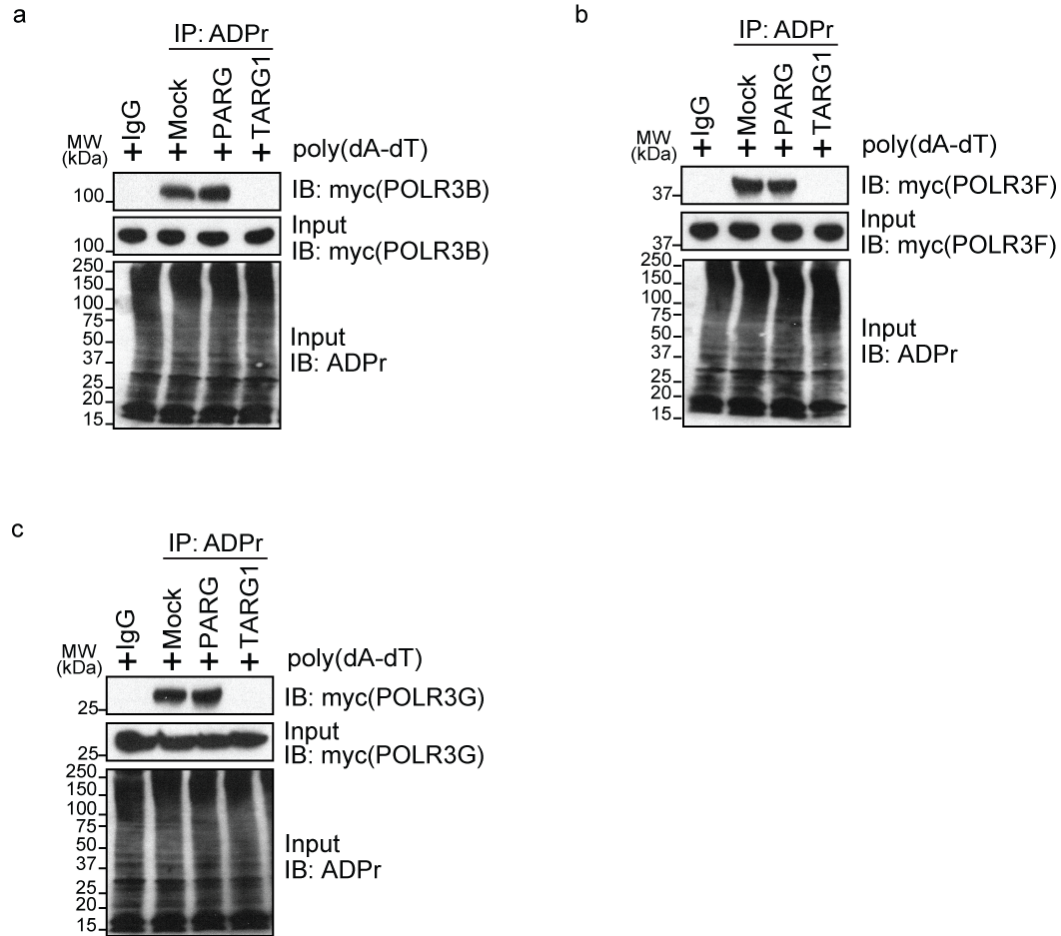

**Supplementary Fig. S7. PARG obviously cannot remove the ADP-ribosylation on Pol III.** (a, b and c) Myc-tagged Pol III B, F or G subunit was expressed in the poly(dA-dT)-stimulated U2OS cells (5  $\mu$ g/ml, six hours). The ADP-ribosylated Pol III was IPed with anti-ADPr antibody and the IPed complex was treated with PARG or TARG1. The samples were examined by Western blotting.



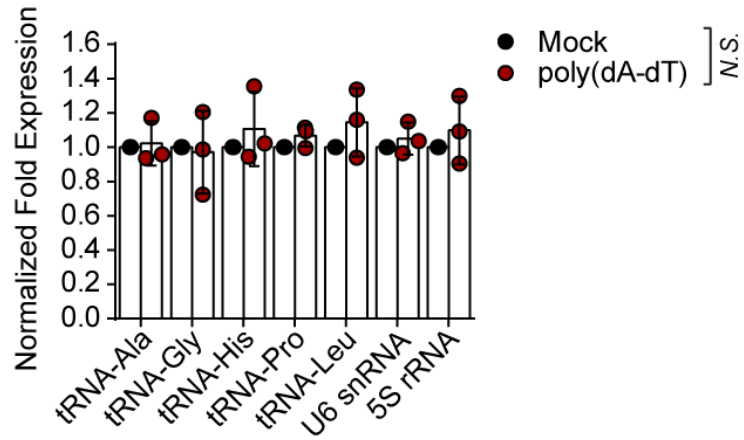

**Supplementary Fig. S8. ADP-ribosylation on Pol III does not affect the expression of Pol III-dependent RNA transcription during the early phase of apoptosis.** Five hours after treatment with 5  $\mu\text{g/ml}$  of poly(dA-dT), the expression of several tRNAs, U6 snRNA or 5S rRNA was analyzed by RT-qPCR in U2OS cells. Data are represented as mean  $\pm$  s.d. as indicated from three independent experiments. Significance of differences was evaluated by Student's t test. *N.S.*: Non-Significant.

a

POLR3F EKL<sup>92</sup>VYQII<sup>100</sup>E\*DAGNKGIW<sup>108 aa</sup>  
 E100A EKL<sup>92</sup>VYQII<sup>100</sup>A DAGNKGIW

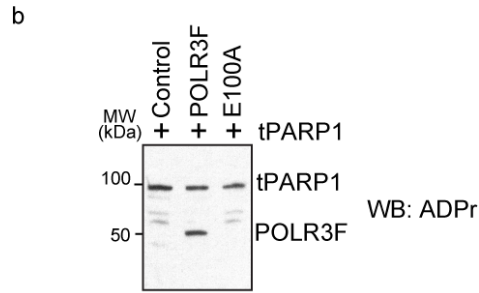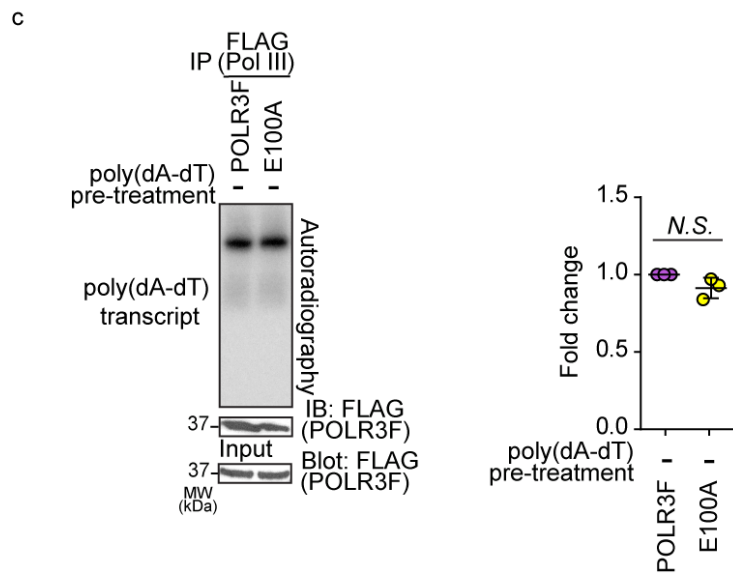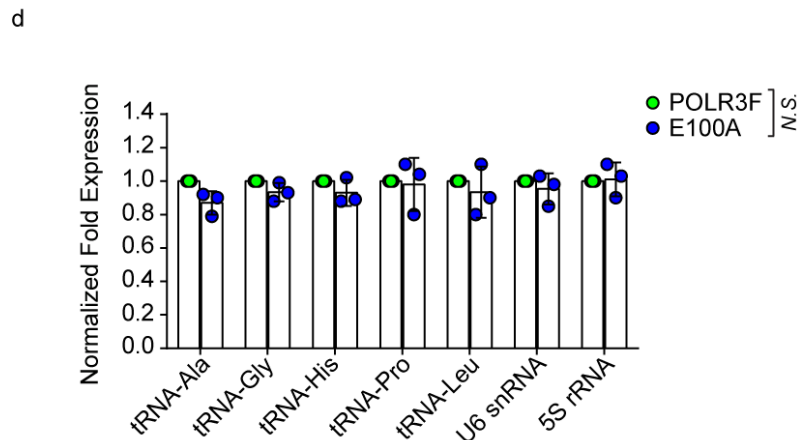

**Supplementary Fig. S9. E100 of POLR3F does not impair the enzymatic activity of Pol III**

**without poly(dA-dT) treatment.** (a) The amino acid sequence (92-108 aa) of POLR3F is shown,

and asterisk denotes E100 in POLR3F. E100A was generated by replacing E100 with Ala. (b) E100A was unable to be ADP-ribosylated by tPARP1 *in vitro*. (c) The enzymatic activity of E100A mutation on poly(dA-dT) transcripts was similar with wide type without poly(dA-dT) treatment. (d) No obvious changes were observed in the transcriptions of general Pol III targets in E100A mutation without poly(dA-dT) treatment. Data are represented as mean  $\pm$  s.d. as indicated from three independent experiments. Significance of differences was evaluated by Student's t test. *N.S.*: Non-Significant.

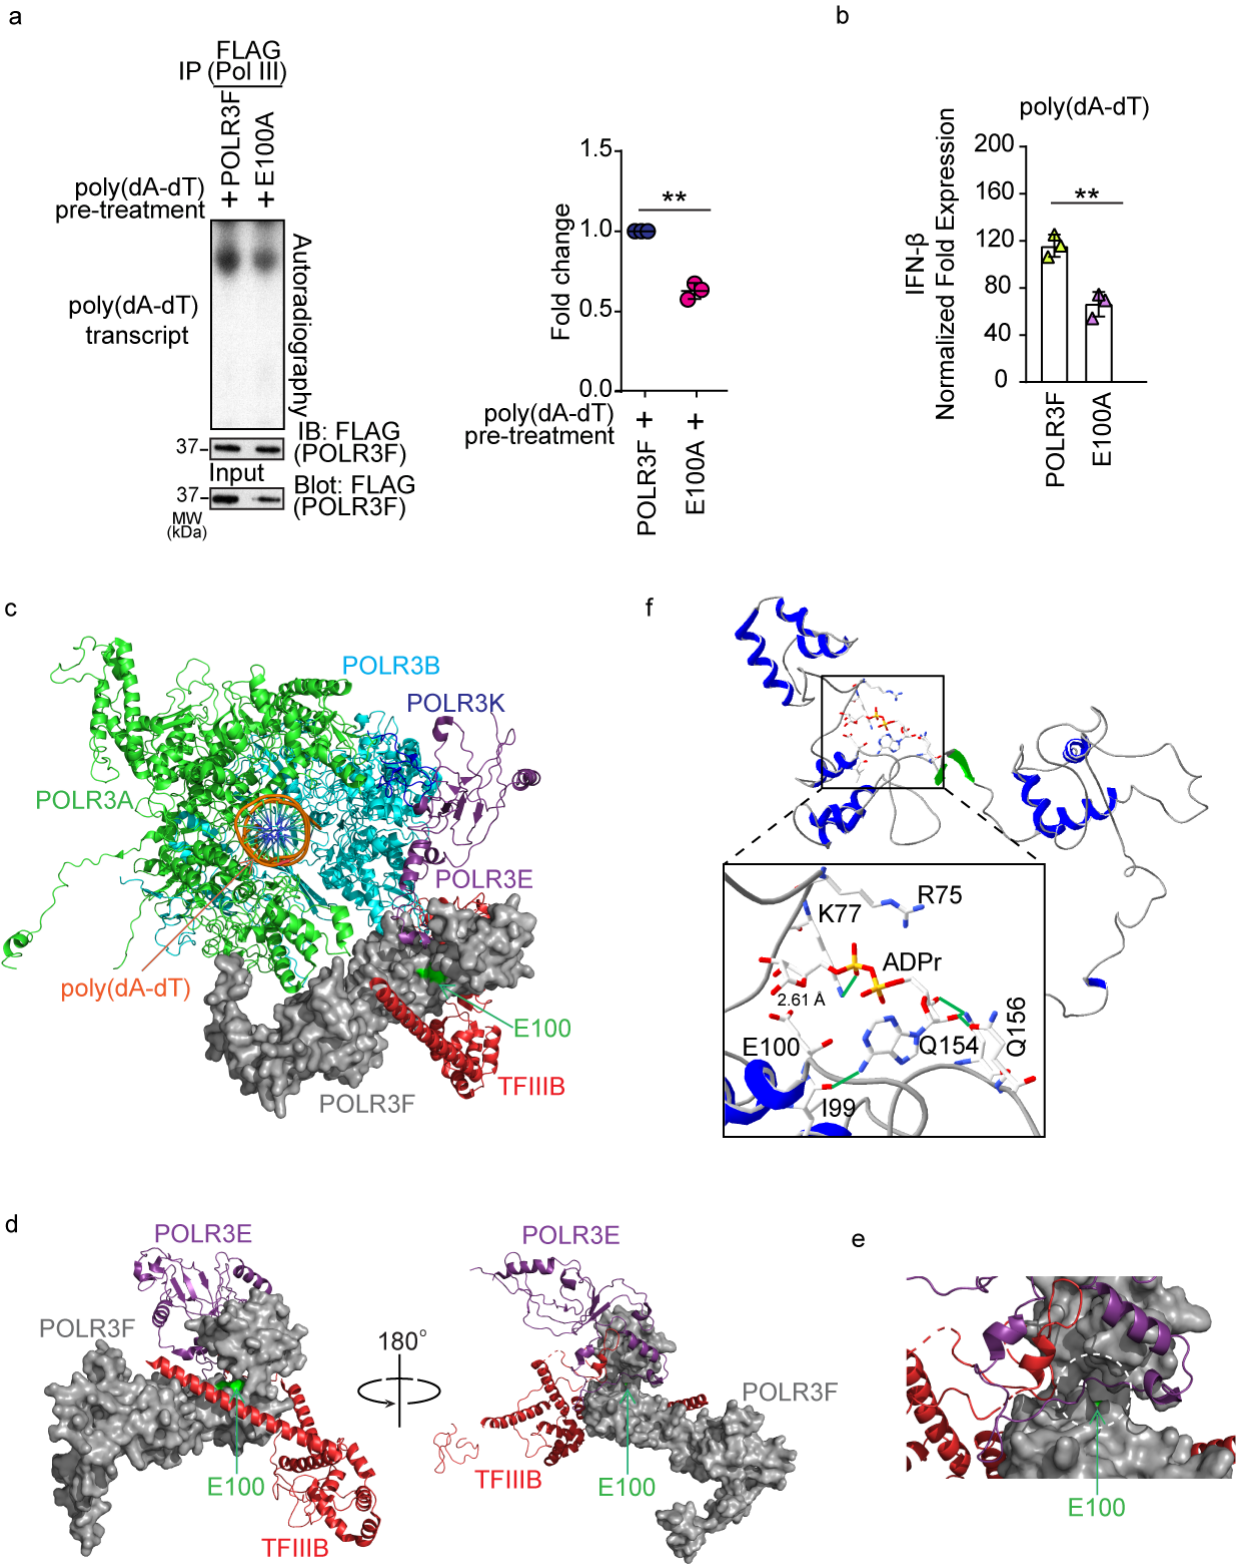

**Supplementary Fig. S10. E100 of POLR3F regulates the enzymatic activity of Pol III during**

**poly(dA-dT)-stimulated apoptosis.** (a) The E100A mutation of POLR3F reduces the enzyme activity of Pol III after poly(dA-dT) treatment (5  $\mu$ g/ml, six hours). (b) The E100A mutation of POLR3F inhibited the IFN- $\beta$  induction after poly(dA-dT) treatment (5  $\mu$ g/ml, six hours). (c) Model of ADP-ribosylated POLR3F regulates the activity of Pol III. The Pol III subunits POLR3A-POLR3B-POLR3E-POLR3F-POLR3K and TFIII B are individually colored. poly(dA-dT) and E100 in POLR3F are depicted in orange and green, respectively. (d) Structure of the POLR3E-POLR3F-TFIII B complex. E100 of POLR3F is in a flexible pocket. (e) The pocket of POLR3F was circled by dashed line. (f) The ADP-ribosylation of E100 of POLR3F is modeled by GEMDOCK. The docked pose is located in the pocket mainly formed by K77, R75, I99, E100, Q154, and Q156. Green and black dashes indicate possible hydrogen bonds and the distance between two atoms, respectively. Data are represented as mean  $\pm$  s.d. as indicated from three independent experiments. Significance of differences was evaluated by Student's t test. \*\*: Statistically Significant ( $p < 0.01$ ).

a

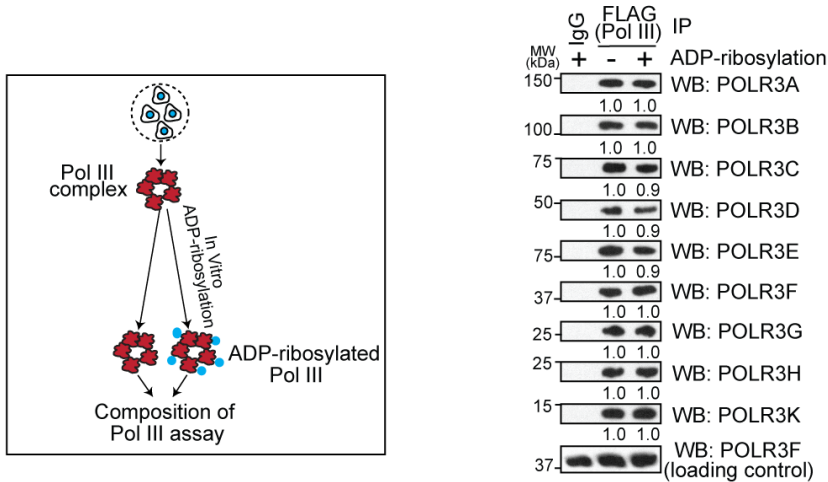

b

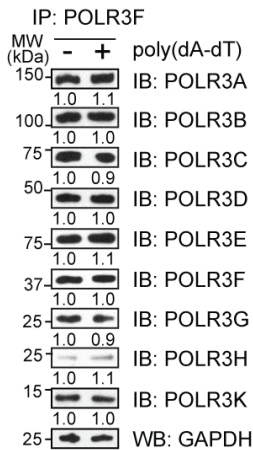

### Supplementary Fig. S11. ADP-ribosylation does not alter the composition of Pol III

**complex.** (a) Pol III complex was purified from U2OS cells stably expressing FLAG-POLR3F and ADP-ribosylated by tPARP1 *in vitro*. The components of ADP-ribosylated Pol III complex were examined by Western blot with specific antibodies against individual subunit in the Pol III complex. The expression of POLR3F was used as a loading control. (b) Pol III complex was IPed from cytoplasmic fraction in U2OS cells treated with or without poly(dA-dT) (5  $\mu$ g/ml, six hours). The Pol III complex was examined with indicated antibodies.

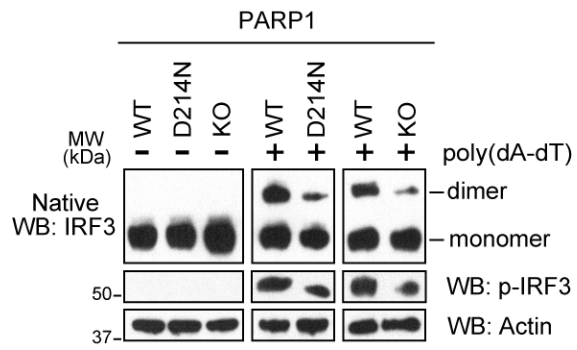

**Supplementary Fig. S12. PARP1 cleavage promotes RIG-I activation during poly(dA-dT)-induced apoptosis.** IRF3 dimerization and phosphorylation of IRF3 were analyzed in wide type U2OS cells, PARP1-null cells or non-cleavable PARP1 cells (D214N) with or without poly(dA-dT) (5  $\mu$ g/ml, six hours) using Western blotting with specific antibodies.

a

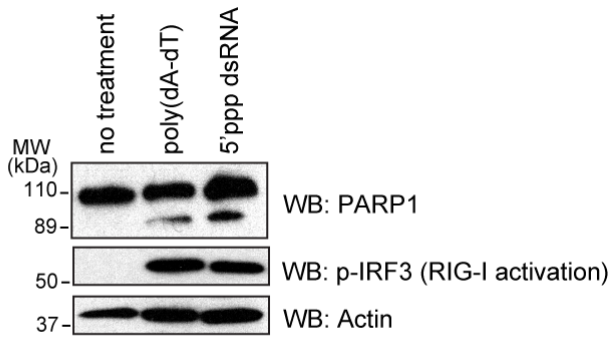

b

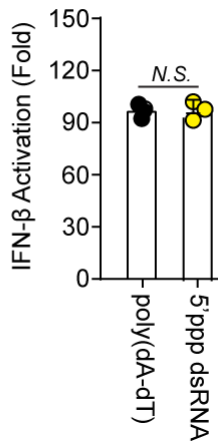

**Supplementary Fig. S13. Apoptotic cell response to the direct RIG-I stimulation.** (a) PARP1 cleavage and RIG-I activation were examined in wild-type U2OS cells after 5  $\mu$ g/ml of poly(dA-dT) or 5' triphosphate double-stranded RNA (5'ppp dsRNA) induction. (b) Induction of IFN- $\beta$  by 5  $\mu$ g/ml of poly(dA-dT) or 5' triphosphate double-stranded RNA (5'ppp dsRNA) was analyzed by luciferase reporter assay in wild-type U2OS cells. Data are represented as mean  $\pm$  s.d. as indicated from three independent experiments. Significance of differences was evaluated by Student's t test. *N.S.*: Non-Significant.



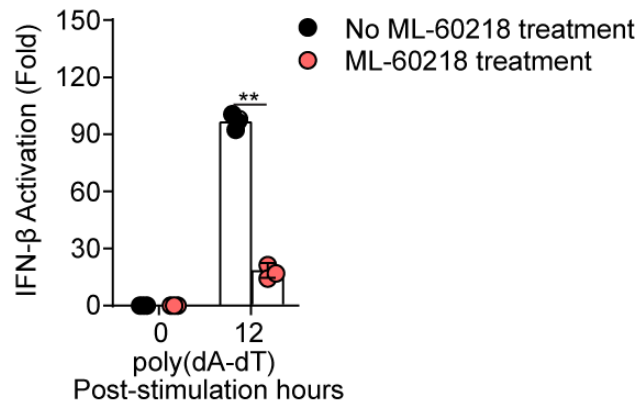

**Supplementary Fig. S14. tPARP1 facilitates the generation of IFN- $\beta$  through Pol III transcription in poly(dA-dT)-mediated apoptotic cells.** The cells were treated with 30  $\mu$  M Pol III inhibitor ML-60218 for 2 hours to inhibit the transcription activity of Pol III, then the IFN- $\beta$  production was examined by luciferase reporter assay. Data are represented as mean  $\pm$  s.d. as indicated from three independent experiments. Significance of differences was evaluated by Student's t test. \*\*: Statistically Significant ( $p < 0.01$ ).

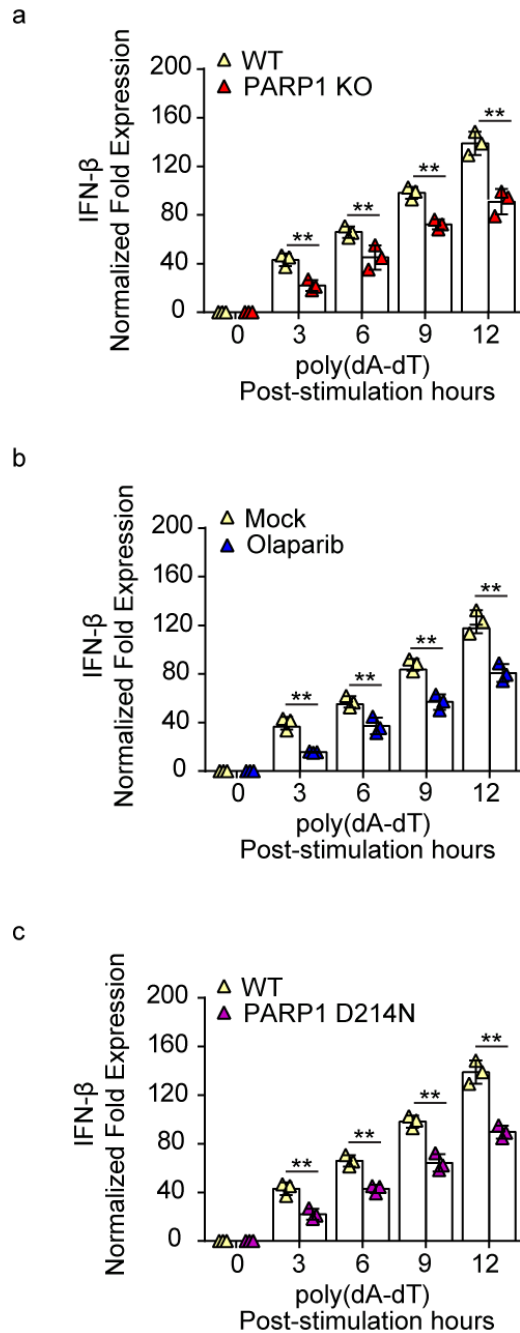

**Supplementary Fig. S15. PARP1 cleavage promotes the production of IFN- $\beta$  during poly(dA-dT)-induced apoptosis through RT-qPCR analysis.** (a) Induction of IFN- $\beta$  by poly(dA-dT) was analyzed by RT-qPCR in wide type U2OS cells or PARP1-null cells. (b) Induction of IFN- $\beta$  by poly(dA-dT) was examined by RT-qPCR in U2OS cells pre-treated with or without 1  $\mu$ M olaparib

for 1 hour. (c) Induction of IFN- $\beta$  by poly(dA-dT) in PARP1-null cells reconstructed with wild-type PARP1 or the D214N mutant was determined by RT-qPCR. Note that the cells were harvested after six hours post-stimulation by 5  $\mu\text{g/ml}$  of poly(dA-dT). Data are represented as mean  $\pm$  s.d. as indicated from three independent experiments. Significance of differences was evaluated by Student's t test. \*\*: Statistically Significant ( $p < 0.01$ ).

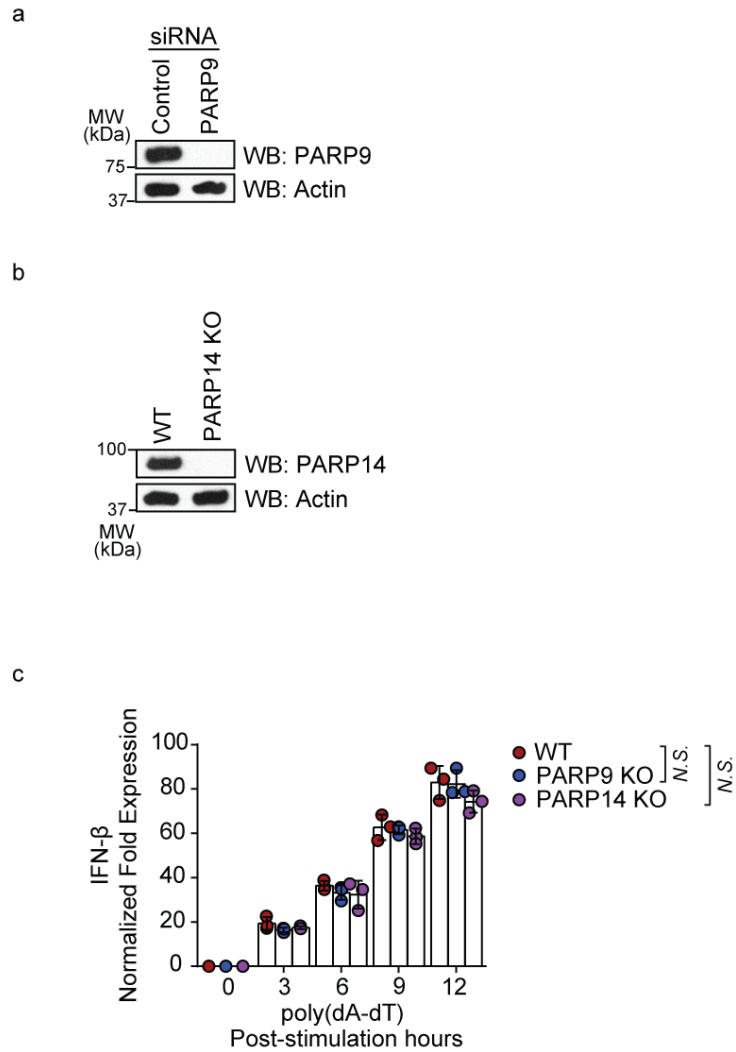

**Supplementary Fig. S16. PARP9 or PARP14 has little impact on IFN- $\beta$  expression during poly(dA-dT)-induced apoptosis.** (a) A549 cells were treated with control siRNA or PARP9 siRNA. The expression level of PARP9 in the cells was examined by Western blot with anti-PARP9 antibody. (b) The depletion of PARP14 was confirmed by Western blot with anti-PARP14 antibody in wild type A549 cells and PARP14 KO cells. (c) Induction of IFN- $\beta$  was examined by RT-qPCR in wild type cells, PARP9-null cells or PARP14-null cells treated with 5  $\mu$ g/ml of poly(dA-dT) for six hours. Data are represented as mean  $\pm$  s.d. as indicated from three independent experiments. Significance of differences was evaluated by Student's t test. *N.S.*: Non Significant.

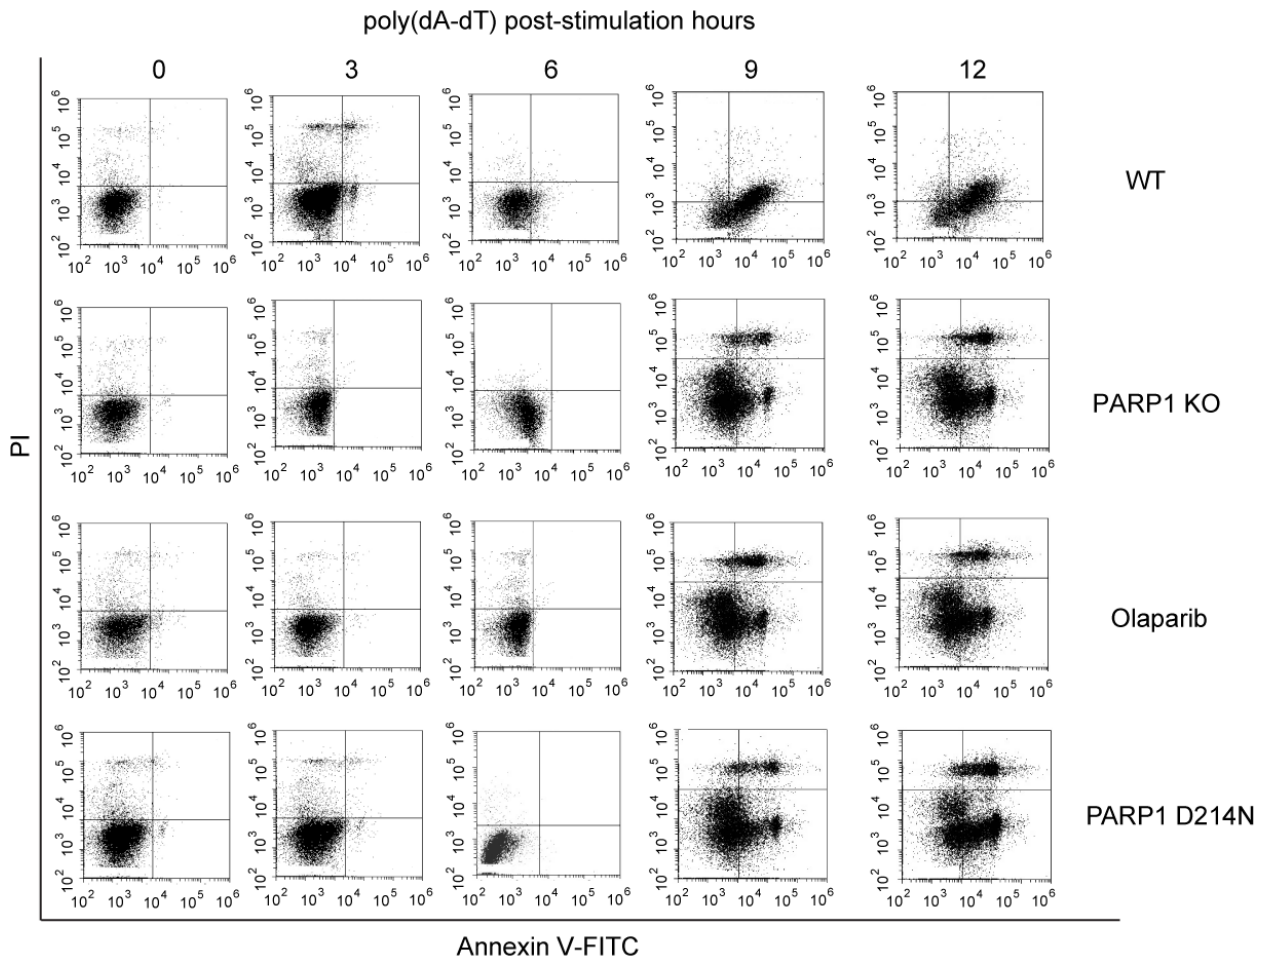

**Supplementary Fig. S17. The flow cytometry images of apoptosis-induced by 5  $\mu\text{g/ml}$  of poly(dA-dT) in wide-type U2OS cells, PARP1 KO U2OS cells, olaparib-treated cells and PARP1 D214N U2OS cells.**

a

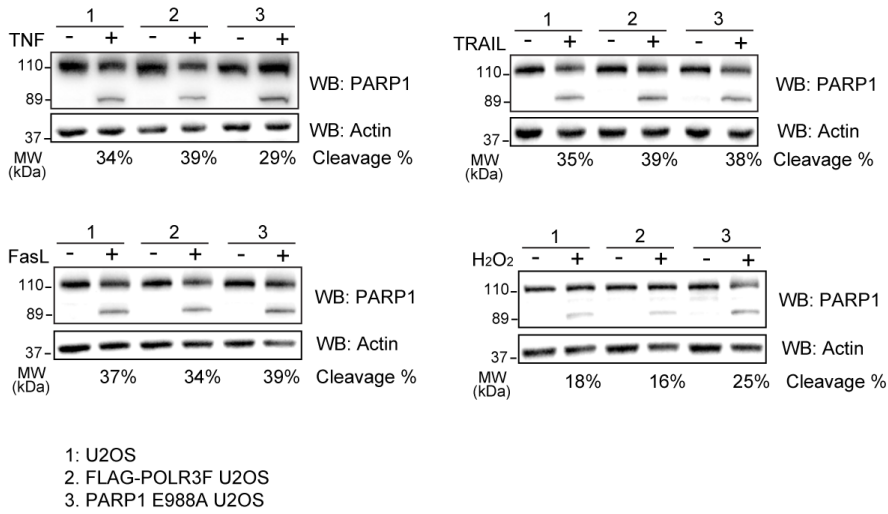

b

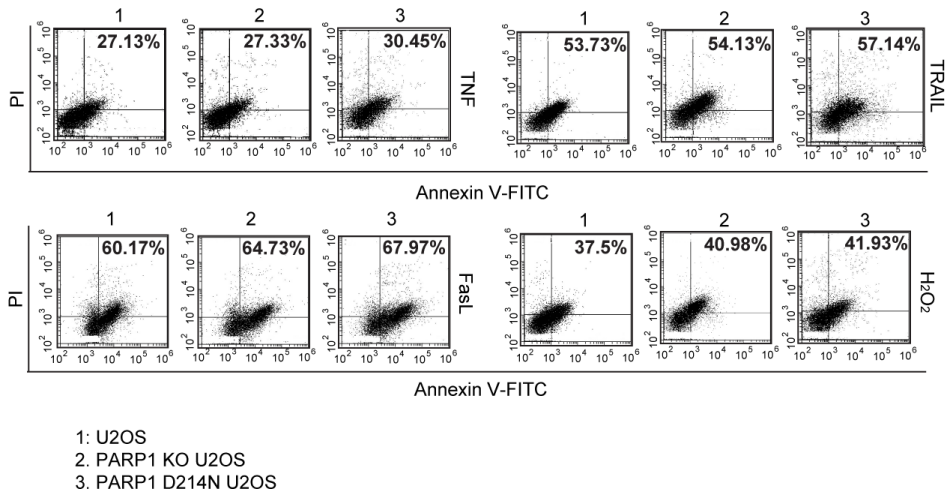

**Supplementary Fig. S18. The parental and engineered cells in apoptosis triggered in TNF,**

**TRAIL, FasL or H<sub>2</sub>O<sub>2</sub>.** (a) The cleavage of PARP1 was examined in TNF-, TRAIL-, FasL- or

H<sub>2</sub>O<sub>2</sub>-stimulated apoptotic U2OS cells, FLAG-POLR3F U2OS cells or PARP1 E988A U2OS

cells. The ratio of cleaved PARP1 was included. (b) Apoptosis-induced by TNF, TRAIL, FasL or

H<sub>2</sub>O<sub>2</sub> in U2OS cells, PARP1 KO U2OS cells or PARP1 D214N U2OS cells was determined by

Annexin V-FITC/PI double-staining.

a

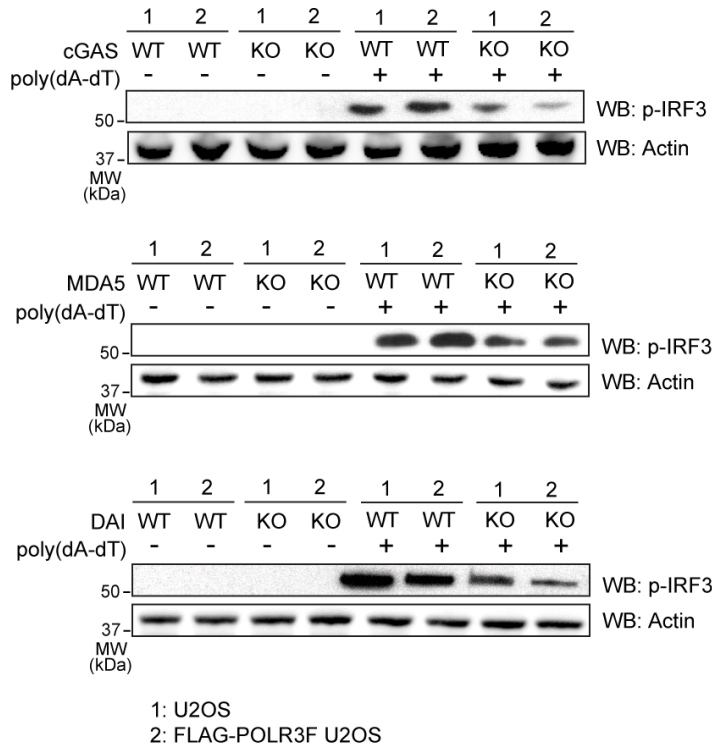

b

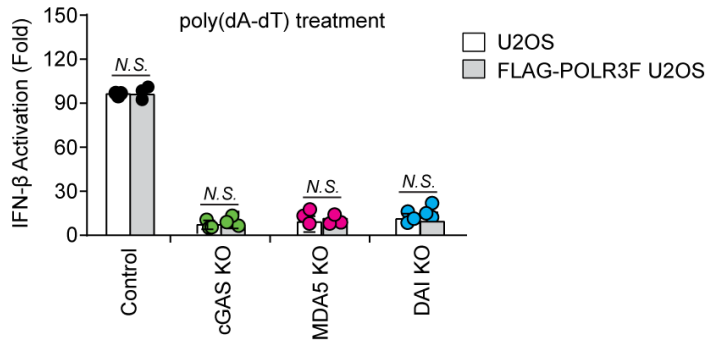

**Supplementary Fig. S19. The activation of non-RIG-I PRR in FLAG-POLR3F U2OS cells.**

(a) The IRF3 phosphorylation in cGAS-, MDA5- and DAI-deficient cells after poly(dA-dT) treatment was detected using Western blotting. (b) Induction of IFN- $\beta$  by poly(dA-dT) was analyzed by luciferase reporter assay in FLAG-POLR3F U2OS cells or cGAS-, MDA5- and DAI-null cells. Data are represented as mean  $\pm$  s.d. as indicated from three independent experiments. Significance of differences was evaluated by Student's t test. N.S.: Non Significant.

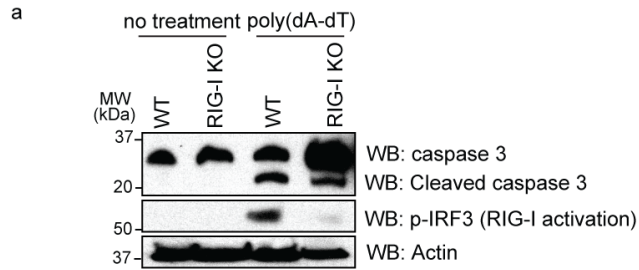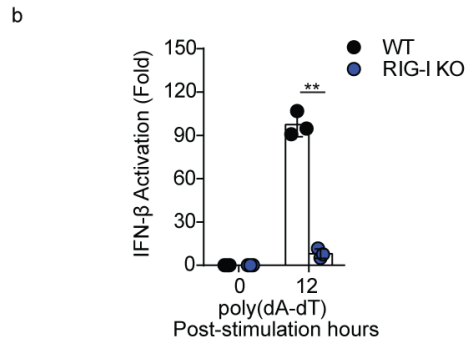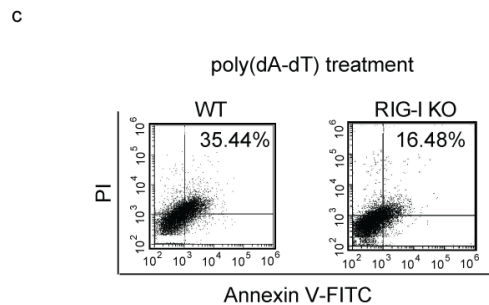

**Supplementary Fig. S20. RIG-I pathway promotes poly(dA-dT)-induced apoptosis.** (a)

Caspase 3 cleavage and phosphorylation of IRF3 were analyzed in wide-type U2OS cells or RIG-I-null cells with poly(dA-dT) (5  $\mu$ g/ml, six hours) using Western blotting with specific antibodies.

(b) Induction of IFN- $\beta$  by 5  $\mu$ g/ml of poly(dA-dT) was analyzed by luciferase reporter assay in wild-type U2OS cells or RIG-I-null cells.

(c) Apoptosis-induced by 5  $\mu$ g/ml of poly(dA-dT) in wild-type U2OS cells or RIG-I-null cells was determined by Annexin V-FITC/PI double-staining.

Data are represented as mean  $\pm$  s.d. as indicated from three independent experiments. Significance

of differences was evaluated by Student's t test. \*\*: Statistically Significant ( $p < 0.01$ ).



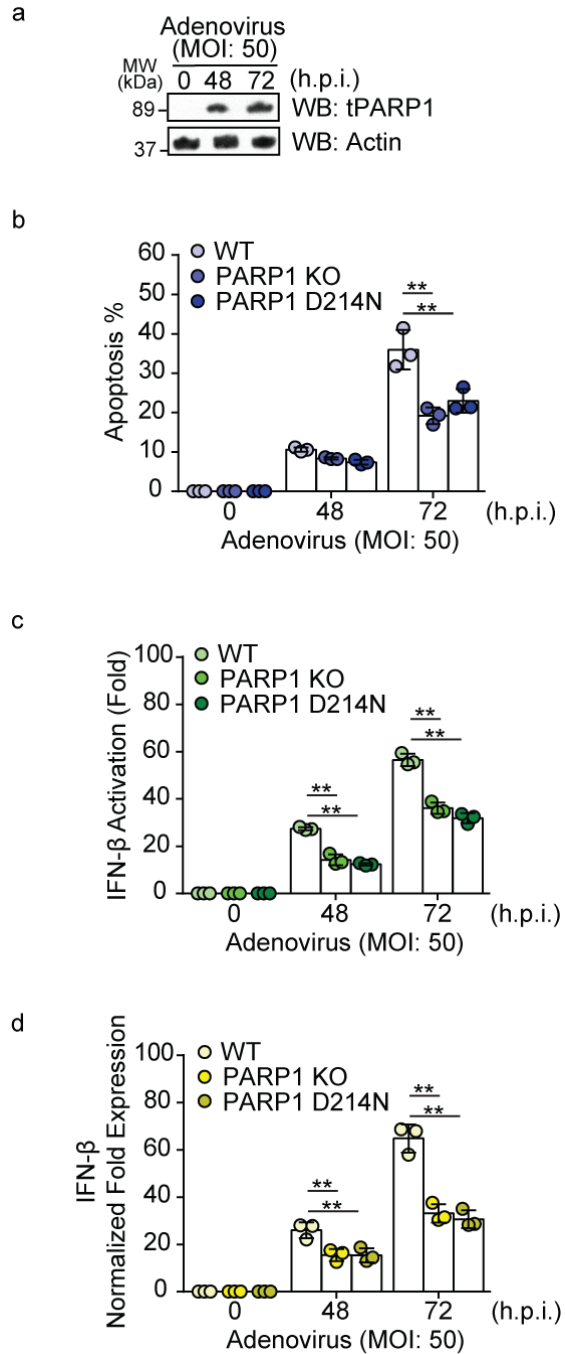

**Supplementary Fig. S21. PARP1 cleavage facilitates innate immune response and promotes apoptosis induced by adenovirus infection.** (a) Raw264.7 cells were infected with adenovirus at the 50 MOI with 48 hours or 72 hours. The cleavage of PARP1 was examined in a time course in adenovirus-induced apoptotic cells with anti-PARP1 C-terminus antibody. (b) Apoptosis-induced

by adenovirus in wide type Raw264.7 cells, PARP1-null cells or non-cleavable PARP1 cells (D214N) was determined by Annexin V-FITC/PI double-staining. (c) Induction of IFN- $\beta$  by adenovirus was analyzed by luciferase reporter assay in wide type cells, PARP1-null cells or non-cleavable PARP1 cells (D214N). (d) Induction of endogenous IFN- $\beta$  by adenovirus was analyzed by RT-qPCR in wide type cells, PARP1-null cells or non-cleavable PARP1 cells (D214N). Data are represented as mean  $\pm$  s.d. as indicated from three independent experiments. Significance of differences was evaluated by Student's t test. \*\*: Statistically Significant ( $p < 0.01$ ).

**Supplemental Table S1. Tandem affinity purification and mass spectrometry of mutant tPARP1 (mtPARP1).**

| Unique | Total | Reference          | Gene Symbol | MWT(kDa) | AVG    |
|--------|-------|--------------------|-------------|----------|--------|
| 109    | 377   | P09874_PARP1_HUMAN | PARP1       | 113.01   | 2.5485 |
| 54     | 83    | P12956_XRCC6_HUMAN | XRCC6       | 69.8     | 3.0713 |
| 53     | 86    | P13010_XRCC5_HUMAN | XRCC5       | 82.65    | 2.7697 |
| 19     | 19    | Q16531_DDB1_HUMAN  | DDB1        | 126.89   | 2.4996 |
| 16     | 16    | P11142_HSP7C_HUMAN | HSPA8       | 70.85    | 3.3824 |
| 15     | 17    | P11021_GRP78_HUMAN | HSPA5       | 72.29    | 3.2708 |
| 13     | 13    | P38646_GRP75_HUMAN | HSPA9       | 73.63    | 2.9679 |
| 12     | 12    | P08107_HSP71_HUMAN | HSPA1A      | 70.01    | 2.9184 |
| 11     | 12    | Q14527_HLTF_HUMAN  | HLTF        | 113.86   | 2.7495 |
| 10     | 12    | P62805_H4_HUMAN    | HIST1H4A    | 11.36    | 2.8744 |
| 10     | 10    | P23396_RS3_HUMAN   | RPS3        | 26.67    | 2.8998 |
| 9      | 11    | P34931_HS71L_HUMAN | HSPA1L      | 70.33    | 3.5281 |
| 8      | 9     | Q13885_TBB2A_HUMAN | TUBB2A      | 49.87    | 3.2208 |
| 7      | 7     | O15160_RPAC1_HUMAN | POLR1C      | 39.23    | 3.393  |
| 7      | 7     | Q00059_TFAM_HUMAN  | TFAM        | 29.08    | 2.4731 |
| 7      | 7     | P27694_RFA1_HUMAN  | RPA1        | 68.1     | 2.4104 |
| 6      | 7     | Q96RQ3_MCCA_HUMAN  | MCCC1       | 80.42    | 3.1271 |
| 6      | 6     | Q71U36_TBA1A_HUMAN | TUBA1A      | 50.1     | 3.3291 |
| 6      | 6     | O14802_RPC1_HUMAN  | POLR3A      | 155.54   | 2.403  |
| 5      | 6     | P33778_H2B1B_HUMAN | HIST1H2BB   | 13.94    | 2.9021 |

---

|   |   |                     |           |        |        |
|---|---|---------------------|-----------|--------|--------|
| 5 | 5 | O60264_SMCA5_HUMAN  | SMARCA5   | 121.83 | 3.437  |
| 5 | 5 | P04279_SEMG1_HUMAN  | SEMG1     | 52.1   | 3.0447 |
| 5 | 5 | P07355_ANXA2_HUMAN  | ANXA2     | 38.58  | 2.9969 |
| 5 | 5 | Q13112_CAF1B_HUMAN  | CHAF1B    | 61.45  | 2.6485 |
| 4 | 7 | Q16695_H31T_HUMAN   | HIST3H3   | 15.5   | 2.1025 |
| 4 | 5 | Q04837_SSBP_HUMAN   | SSBP1     | 17.25  | 3.4348 |
| 4 | 5 | Q9UNY4_TTF2_HUMAN   | TTF2      | 129.51 | 2.5979 |
| 4 | 4 | P16220_CREB1_HUMAN  | CREB1     | 36.67  | 3.4467 |
| 4 | 4 | P33993_MCM7_HUMAN   | MCM7      | 81.26  | 3.2773 |
| 4 | 4 | P62987_RL40_HUMAN   | UBA52     | 14.72  | 2.9192 |
| 4 | 4 | P68104_EEF1A1_HUMAN | EEF1A1    | 50.11  | 2.7684 |
| 4 | 4 | P54652_HSP72_HUMAN  | HSPA2     | 69.98  | 2.5195 |
| 4 | 4 | Q9NW08_RPC2_HUMAN   | POLR3B    | 127.7  | 2.4926 |
| 4 | 4 | Q96QV6_H2A1A_HUMAN  | HIST1H2AA | 14.22  | 2.4777 |
| 4 | 4 | P15927_RFA2_HUMAN   | RPA2      | 29.23  | 2.3949 |
| 4 | 4 | Q9H1D9_RPC6_HUMAN   | POLR3F    | 35.66  | 2.3889 |
| 3 | 4 | P10809_CH60_HUMAN   | HSPD1     | 61.02  | 3.4653 |
| 3 | 4 | P31260_HXA10_HUMAN  | HOXA10    | 42.39  | 3.1152 |
| 3 | 4 | Q13426_XRCC4_HUMAN  | XRCC4     | 38.26  | 2.8689 |
| 3 | 4 | P15336_ATF2_HUMAN   | ATF2      | 54.5   | 2.7039 |
| 3 | 4 | P07910_HNRPC_HUMAN  | HNRNPC    | 33.65  | 2.5858 |
| 3 | 3 | Q12800_TFCP2_HUMAN  | TFCP2     | 57.22  | 4.1159 |
| 3 | 3 | P05412_JUN_HUMAN    | JUN       | 35.65  | 4.0784 |
| 3 | 3 | P31943_HNRH1_HUMAN  | HNRNPH1   | 49.2   | 3.7096 |
| 3 | 3 | Q09028_RBBP4_HUMAN  | RBBP4     | 47.63  | 3.4654 |

---

---

|   |   |                    |           |       |        |
|---|---|--------------------|-----------|-------|--------|
| 3 | 3 | Q9UQR1_ZN148_HUMAN | ZNF148    | 88.92 | 3.1581 |
| 3 | 3 | Q15517_CDSN_HUMAN  | CDSN      | 51.49 | 3.1575 |
| 3 | 3 | P06733_ENOA_HUMAN  | ENO1      | 47.14 | 3.1325 |
| 3 | 3 | P05141_ADT2_HUMAN  | SLC25A5   | 32.83 | 3.1104 |
| 3 | 3 | Q02383_SEMG2_HUMAN | SEMG2     | 65.41 | 3.1085 |
| 3 | 3 | P18846_ATF1_HUMAN  | ATF1      | 29.21 | 3.0964 |
| 3 | 3 | P08670_VIME_HUMAN  | VIM       | 53.62 | 3.0747 |
| 3 | 3 | Q9H4B7_TBB1_HUMAN  | TUBB1     | 50.29 | 2.9917 |
| 3 | 3 | P04908_H2A1B_HUMAN | HIST1H2AB | 14.13 | 2.9784 |
| 3 | 3 | Q13509_TBB3_HUMAN  | TUBB3     | 50.4  | 2.9386 |
| 3 | 3 | P18754_RCC1_HUMAN  | RCC1      | 44.94 | 2.6984 |
| 3 | 3 | Q12905_ILF2_HUMAN  | ILF2      | 43.04 | 2.5999 |
| 3 | 3 | P01876_IGHA1_HUMAN | IGHA1     | 37.63 | 2.5787 |
| 3 | 3 | Q9Y230_RUVB2_HUMAN | RUVBL2    | 51.12 | 2.5563 |
| 3 | 3 | P40939_ECHA_HUMAN  | HADHA     | 82.95 | 2.5555 |
| 3 | 3 | Q06830_PRDX1_HUMAN | PRDX1     | 22.1  | 2.5457 |
| 3 | 3 | Q07065_CKAP4_HUMAN | CKAP4     | 65.98 | 2.2344 |
| 3 | 3 | Q9Y265_RUVB1_HUMAN | RUVBL1    | 50.2  | 2.2137 |
| 2 | 3 | P17535_JUND_HUMAN  | JUND      | 35.15 | 3.7042 |
| 2 | 3 | Q9NXF7_DCA16_HUMAN | DCAF16    | 24.18 | 3.678  |
| 2 | 3 | Q5T0B9_ZN362_HUMAN | ZNF362    | 45.79 | 3.3234 |
| 2 | 3 | Q8NHW5_RLA0L_HUMAN | RPLP0P6   | 34.34 | 3.1873 |
| 2 | 3 | P15880_RS2_HUMAN   | RPS2      | 31.3  | 2.6329 |
| 2 | 3 | P62081_RS7_HUMAN   | RPS7      | 22.11 | 2.0019 |
| 2 | 2 | P17544_ATF7_HUMAN  | ATF7      | 52.93 | 3.9408 |

---

---

|   |   |                    |          |        |        |
|---|---|--------------------|----------|--------|--------|
| 2 | 2 | Q9NZI7_UBIP1_HUMAN | UBP1     | 60.45  | 3.8354 |
| 2 | 2 | P40424_PBX1_HUMAN  | PBX1     | 46.6   | 3.8171 |
| 2 | 2 | Q9BUI4_RPC3_HUMAN  | POLR3C   | 60.57  | 3.6999 |
| 2 | 2 | P83916_CBX1_HUMAN  | CBX1     | 21.4   | 3.6281 |
| 2 | 2 | P61978_HNRPK_HUMAN | HNRNPK   | 50.94  | 3.4552 |
| 2 | 2 | P62913_RL11_HUMAN  | RPL11    | 20.24  | 3.4448 |
| 2 | 2 | Q13185_CBX3_HUMAN  | CBX3     | 20.8   | 3.3953 |
| 2 | 2 | O43390_HNRPR_HUMAN | HNRNPR   | 70.9   | 3.3226 |
| 2 | 2 | P04406_G3P_HUMAN   | GAPDH    | 36.03  | 3.2598 |
| 2 | 2 | Q9H2Z4_NKX24_HUMAN | NKX2-4   | 36.16  | 3.2302 |
| 2 | 2 | O15355_PPM1G_HUMAN | PPM1G    | 59.23  | 3.2139 |
| 2 | 2 | Q9Y530_OARD1_HUMAN | OARD1    | 17.01  | 3.2134 |
| 2 | 2 | B7ZW38_HNRC3_HUMAN | HNRNPCL3 | 32.01  | 3.0502 |
| 2 | 2 | Q7Z6I8_CE024_HUMAN | C5orf24  | 20.12  | 3.0351 |
| 2 | 2 | P56177_DLX1_HUMAN  | DLX1     | 27.3   | 2.948  |
| 2 | 2 | P10599_THIO_HUMAN  | TXN      | 11.73  | 2.9448 |
| 2 | 2 | P08238_HS90B_HUMAN | HSP90AB1 | 83.21  | 2.8932 |
| 2 | 2 | Q15233_NONO_HUMAN  | NONO     | 54.2   | 2.8634 |
| 2 | 2 | P78371_TCPB_HUMAN  | CCT2     | 57.45  | 2.736  |
| 2 | 2 | P62263_RS14_HUMAN  | RPS14    | 16.26  | 2.7058 |
| 2 | 2 | Q13952_NFYC_HUMAN  | NFYC     | 50.27  | 2.7008 |
| 2 | 2 | P35244_RFA3_HUMAN  | RPA3     | 13.56  | 2.6307 |
| 2 | 2 | Q71UI9_H2AV_HUMAN  | H2AFV    | 13.5   | 2.6109 |
| 2 | 2 | Q9Y5B9_SP16H_HUMAN | SUPT16H  | 119.84 | 2.5449 |
| 2 | 2 | Q13867_BLMH_HUMAN  | BLMH     | 52.53  | 2.535  |

---

---

|   |   |                     |           |        |        |
|---|---|---------------------|-----------|--------|--------|
| 2 | 2 | P35659_DEK_HUMAN    | DEK       | 42.65  | 2.5007 |
| 2 | 2 | P28370_SMCA1_HUMAN  | SMARCA1   | 122.53 | 2.4592 |
| 2 | 2 | P62249_RS16_HUMAN   | RPS16     | 16.44  | 2.4534 |
| 2 | 2 | P62807_H2B1C_HUMAN  | HIST1H2BC | 13.9   | 2.4103 |
| 2 | 2 | Q9UQ35_SRRM2_HUMAN  | SRRM2     | 299.44 | 2.4032 |
| 2 | 2 | P62277_RS13_HUMAN   | RPS13     | 17.21  | 2.3978 |
| 2 | 2 | Q02539_H11_HUMAN    | HIST1H1A  | 21.83  | 2.3776 |
| 2 | 2 | Q96A08_H2B1A_HUMAN  | HIST1H2BA | 14.16  | 2.3395 |
| 2 | 2 | P62269_RS18_HUMAN   | RPS18     | 17.71  | 2.2306 |
| 2 | 2 | P25311_ZA2G_HUMAN   | AZGP1     | 34.24  | 2.1657 |
| 2 | 2 | Q9HCC0_MCCB_HUMAN   | MCCC2     | 61.29  | 1.9686 |
| 1 | 3 | Q2TV78_MST1L_HUMAN  | MST1L     | 79.64  | 1.4163 |
| 1 | 2 | P55209_NP1L1_HUMAN  | NAP1L1    | 45.35  | 2.5539 |
| 1 | 2 | P20226_TBP_HUMAN    | TBP       | 37.67  | 2.5062 |
| 1 | 2 | P01834_IGKC_HUMAN   | IGKC      | 11.6   | 2.4543 |
| 1 | 2 | P32119_PRDX2_HUMAN  | PRDX2     | 21.88  | 2.3775 |
| 1 | 2 | Q9UMX1_SUFU_HUMAN   | SUFU      | 53.91  | 2.3295 |
| 1 | 1 | Q01664_TFAP4_HUMAN  | TFAP4     | 38.7   | 4.9601 |
| 1 | 1 | P35030_TRY3_HUMAN   | PRSS3     | 32.51  | 4.4898 |
| 1 | 1 | Q969G3_SMCE1_HUMAN  | SMARCE1   | 46.62  | 4.2384 |
| 1 | 1 | P07477_TRY1_HUMAN   | PRSS1     | 26.54  | 4.1884 |
| 1 | 1 | P19388_RPAB1_HUMAN  | POLR2E    | 24.54  | 4.1523 |
| 1 | 1 | O75531_BAF_HUMAN    | BANF1     | 10.05  | 4.1056 |
| 1 | 1 | P10515_ODP2_HUMAN   | DLAT      | 68.95  | 4.0879 |
| 1 | 1 | J3KS37_J3KS37_HUMAN | RECQL5    | 24.89  | 4.0608 |

---

---

|   |   |                    |           |        |        |
|---|---|--------------------|-----------|--------|--------|
| 1 | 1 | P61626_LYSC_HUMAN  | LYZ       | 16.53  | 4.0435 |
| 1 | 1 | P35580_MYH10_HUMAN | MYH10     | 228.86 | 3.9329 |
| 1 | 1 | Q07666_KHDR1_HUMAN | KHDRBS1   | 48.2   | 3.8457 |
| 1 | 1 | Q14103_HNRPD_HUMAN | HNRNPB    | 38.41  | 3.6693 |
| 1 | 1 | P52292_IMA1_HUMAN  | KPNA2     | 57.83  | 3.5634 |
| 1 | 1 | P40425_PBX2_HUMAN  | PBX2      | 45.85  | 3.5308 |
| 1 | 1 | P12724_ECP_HUMAN   | RNASE3    | 18.37  | 3.5157 |
| 1 | 1 | P04040_CATA_HUMAN  | CAT       | 59.72  | 3.4987 |
| 1 | 1 | Q9BRT9_SLD5_HUMAN  | GIN5      | 26.03  | 3.455  |
| 1 | 1 | P05387_RLA2_HUMAN  | RPLP2     | 11.66  | 3.4254 |
| 1 | 1 | Q9UGM3_DMBT1_HUMAN | DMBT1     | 260.57 | 3.3814 |
| 1 | 1 | Q99607_ELF4_HUMAN  | ELF4      | 70.69  | 3.3063 |
| 1 | 1 | P41219_PER1_HUMAN  | PRPH      | 53.62  | 3.2423 |
| 1 | 1 | P31271_HXA13_HUMAN | HOXA13    | 39.7   | 3.2304 |
| 1 | 1 | P04350_TBB4A_HUMAN | TUBB4A    | 49.55  | 3.2212 |
| 1 | 1 | B2RPK0_HGB1A_HUMAN | HMGB1P1   | 24.22  | 3.22   |
| 1 | 1 | P17661_DESM_HUMAN  | DES       | 53.5   | 3.2016 |
| 1 | 1 | Q58FF8_H90B2_HUMAN | HSP90AB2P | 44.32  | 3.1443 |
| 1 | 1 | Q9UJU2_LEF1_HUMAN  | LEF1      | 44.17  | 3.1367 |
| 1 | 1 | Q9UQD0_SCN8A_HUMAN | SCN8A     | 225.13 | 3.1227 |
| 1 | 1 | Q01658_NC2B_HUMAN  | DR1       | 19.43  | 3.102  |
| 1 | 1 | P81877_SSBP2_HUMAN | SSBP2     | 37.8   | 3.0627 |
| 1 | 1 | Q12873_CHD3_HUMAN  | CHD3      | 226.45 | 3.053  |
| 1 | 1 | P06748_NPM_HUMAN   | NPM1      | 32.55  | 3.013  |
| 1 | 1 | P07199_CENPB_HUMAN | CENPB     | 65.13  | 3.003  |

---



---

|   |   |                     |         |        |        |
|---|---|---------------------|---------|--------|--------|
| 1 | 1 | Q8WXX5_DNJC9_HUMAN  | DNAJC9  | 29.89  | 2.9986 |
| 1 | 1 | Q8N7H5_PAF1_HUMAN   | PAF1    | 59.94  | 2.9981 |
| 1 | 1 | O60506_HNRPQ_HUMAN  | SYNCRIP | 69.56  | 2.998  |
| 1 | 1 | P60842_IF4A1_HUMAN  | EIF4A1  | 46.12  | 2.9945 |
| 1 | 1 | Q92922_SMRC1_HUMAN  | SMARCC1 | 122.79 | 2.9524 |
| 1 | 1 | P68371_TBB4B_HUMAN  | TUBB4B  | 49.8   | 2.9066 |
| 1 | 1 | P10909_CLUS_HUMAN   | CLU     | 52.46  | 2.8497 |
| 1 | 1 | O15318_RPC7_HUMAN   | POLR3G  | 25.9   | 2.8476 |
| 1 | 1 | Q14566_MCM6_HUMAN   | MCM6    | 92.83  | 2.8081 |
| 1 | 1 | Q03060_CREM_HUMAN   | CREM    | 38.92  | 2.7959 |
| 1 | 1 | P52434_RPAB3_HUMAN  | POLR2H  | 17.13  | 2.7668 |
| 1 | 1 | P31689_DNAJA1_HUMAN | DNAJA1  | 44.84  | 2.7075 |
| 1 | 1 | P52907_CAZA1_HUMAN  | CAPZA1  | 32.9   | 2.7002 |
| 1 | 1 | P25705_ATPA_HUMAN   | ATP5A1  | 59.71  | 2.6172 |
| 1 | 1 | P06576_ATPB_HUMAN   | ATP5B   | 56.52  | 2.5974 |
| 1 | 1 | P50402_EMD_HUMAN    | EMD     | 28.98  | 2.5389 |
| 1 | 1 | P33992_MCM5_HUMAN   | MCM5    | 82.23  | 2.5236 |
| 1 | 1 | P49411_EFTU_HUMAN   | TUFM    | 49.51  | 2.4903 |
| 1 | 1 | Q6ZVX7_FBX50_HUMAN  | NCCRP1  | 30.83  | 2.4509 |
| 1 | 1 | P01857_IGHG1_HUMAN  | IGHG1   | 36.08  | 2.4341 |
| 1 | 1 | P49916_DNLI3_HUMAN  | LIG3    | 112.83 | 2.411  |
| 1 | 1 | Q15431_SYCP1_HUMAN  | SYCP1   | 114.12 | 2.404  |
| 1 | 1 | Q07687_DLX2_HUMAN   | DLX2    | 34.22  | 2.349  |
| 1 | 1 | P02788_TRFL_HUMAN   | LTF     | 78.13  | 2.3235 |
| 1 | 1 | P17480_UBF1_HUMAN   | UBTF    | 89.35  | 2.321  |

---

---

|   |   |                     |        |        |        |
|---|---|---------------------|--------|--------|--------|
| 1 | 1 | P46783_RS10_HUMAN   | RPS10  | 18.89  | 2.3067 |
| 1 | 1 | P14649_MYL6B_HUMAN  | MYL6B  | 22.75  | 2.293  |
| 1 | 1 | Q15393_SF3B3_HUMAN  | SF3B3  | 135.49 | 2.2884 |
| 1 | 1 | O95677_EYA4_HUMAN   | EYA4   | 69.46  | 2.2796 |
| 1 | 1 | P00491_PNP_HUMAN    | PNP    | 32.1   | 2.2743 |
| 1 | 1 | P62851_RS25_HUMAN   | RPS25  | 13.73  | 2.2593 |
| 1 | 1 | Q9UHN1_DPOG2_HUMAN  | POLG2  | 54.88  | 2.246  |
| 1 | 1 | P68871_HBB_HUMAN    | HBB    | 15.99  | 2.2043 |
| 1 | 1 | Q8N8E3_CEP112_HUMAN | CEP112 | 112.68 | 2.1741 |
| 1 | 1 | Q14978_NOLC1_HUMAN  | NOLC1  | 73.56  | 2.1625 |
| 1 | 1 | Q8IVW6_ARID3B_HUMAN | ARID3B | 60.6   | 2.1484 |
| 1 | 1 | P28332_ADH6_HUMAN   | ADH6   | 39.06  | 2.1302 |
| 1 | 1 | P17482_HXB9_HUMAN   | HOXB9  | 28.04  | 2.1108 |
| 1 | 1 | O75367_H2AY_HUMAN   | H2AFY  | 39.59  | 2.1006 |
| 1 | 1 | P13639_EEF2_HUMAN   | EEF2   | 95.28  | 2.0792 |
| 1 | 1 | Q7L5L3_GDPD3_HUMAN  | GDPD3  | 36.57  | 2.0049 |
| 1 | 1 | P62244_RS15A_HUMAN  | RPS15A | 14.83  | 2.0004 |
| 1 | 1 | P45880_VDAC2_HUMAN  | VDAC2  | 31.55  | 1.9732 |
| 1 | 1 | P62826_RAN_HUMAN    | RAN    | 24.41  | 1.9251 |
| 1 | 1 | P22670_RFX1_HUMAN   | RFX1   | 104.69 | 1.924  |
| 1 | 1 | Q9C030_TRIM6_HUMAN  | TRIM6  | 56.36  | 1.9152 |
| 1 | 1 | P22314_UBA1_HUMAN   | UBA1   | 117.77 | 1.9071 |
| 1 | 1 | O43175_SERA_HUMAN   | PHGDH  | 56.61  | 1.8929 |
| 1 | 1 | P69905_HBA_HUMAN    | HBA1   | 15.25  | 1.8706 |
| 1 | 1 | Q13162_PRDX4_HUMAN  | PRDX4  | 30.52  | 1.8574 |

---

---

|   |   |                     |        |       |        |
|---|---|---------------------|--------|-------|--------|
| 1 | 1 | Q9NVU0_RPC5_HUMAN   | POLR3E | 79.85 | 1.855  |
| 1 | 1 | O43248_HXC11_HUMAN  | HOXC11 | 33.73 | 1.8328 |
| 1 | 1 | H0YCG2_H0YCG2_HUMAN | LAMP2  | 28.25 | 1.8086 |

---

**Supplemental Table S2. Summary of tandem affinity purification and mass spectrometry of mutant tPARP1 (mtPARP1), mutant TARG1 (mTARG1), mutant PARP1 (mPARP1) and mutant PARG (mPARG).**

| mtPARP1 |       |             | mPARP1 |       |             | mTARG1 |       |             | mPARG  |       |             |
|---------|-------|-------------|--------|-------|-------------|--------|-------|-------------|--------|-------|-------------|
| Unique  | Total | Gene Symbol | Unique | Total | Gene Symbol | Unique | Total | Gene Symbol | Unique | Total | Gene Symbol |
| 109     | 377   | PARP1       | 108    | 480   | PARP1       | 94     | 443   | PARP1       | 104    | 786   | PARG        |
| 54      | 83    | XRCC6       | 74     | 121   | HLTF        | 83     | 96    | ACACA       | 66     | 95    | PARP1       |
| 53      | 86    | XRCC5       | 70     | 124   | SUPT16H     | 60     | 169   | SUPT16H     | 32     | 85    | PCNA        |
| 19      | 19    | DDB1        | 57     | 61    | PRKDC       | 56     | 217   | XRCC5       | 40     | 74    | HSPA8       |
| 16      | 16    | HSPA8       | 53     | 165   | XRCC5       | 50     | 179   | XRCC6       | 44     | 61    | HSPD1       |
| 15      | 17    | HSPA5       | 50     | 123   | XRCC6       | 49     | 66    | HLTF        | 41     | 50    | XRCC6       |
| 13      | 13    | HSPA9       | 44     | 58    | HNRNPM      | 40     | 43    | PC          | 40     | 49    | XRCC5       |
| 12      | 12    | HSPA1A      | 43     | 49    | CHD1L       | 34     | 41    | LIG3        | 36     | 38    | PRKDC       |
| 11      | 12    | HLTF        | 40     | 48    | DHX9        | 33     | 98    | RPA1        | 35     | 37    | SUPT16H     |
| 10      | 12    | HIST1H4A    | 36     | 53    | LIG3        | 32     | 80    | SSRP1       | 23     | 37    | HSPA1A      |
| 10      | 10    | RPS3        | 34     | 70    | RPA1        | 31     | 46    | MCCC1       | 27     | 36    | HSPA5       |
| 9       | 11    | HSPA1L      | 34     | 42    | DHX30       | 26     | 366   | PCNA        | 23     | 28    | TUBA1A      |
| 8       | 9     | TUBB2A      | 33     | 36    | HDLBP       | 26     | 32    | NCL         | 21     | 28    | RAE1        |
| 7       | 7     | POLR1C      | 32     | 45    | HNRNPU      | 26     | 28    | PCCA        | 23     | 26    | HSPA9       |
| 7       | 7     | TFAM        | 30     | 60    | NCL         | 25     | 56    | MCCC2       | 22     | 26    | TUBB2A      |
| 7       | 7     | RPA1        | 30     | 54    | SSRP1       | 24     | 378   | OARD1       | 22     | 26    | PPP2R1A     |
| 6       | 7     | MCCC1       | 29     | 49    | TMPO        | 24     | 25    | CHD1L       | 19     | 26    | PRDX1       |
| 6       | 6     | TUBA1A      | 29     | 32    | CKAP5       | 23     | 26    | PARP2       | 11     | 26    | HSPA1L      |
| 6       | 6     | POLR3A      | 28     | 33    | YTHDC2      | 22     | 27    | THRAP3      | 22     | 25    | HSPH1       |
| 5       | 6     | HIST1H2BB   | 28     | 31    | GTPBP4      | 22     | 24    | XPC         | 21     | 25    | EEF2        |
| 5       | 5     | SMARCA5     | 27     | 48    | RPL4        | 22     | 24    | WRN         | 19     | 22    | PKM         |
| 5       | 5     | SEMG1       | 26     | 336   | OARD1       | 21     | 22    | CKAP4       | 19     | 21    | HSPA4       |
| 5       | 5     | ANXA2       | 26     | 72    | RPS4X       | 21     | 21    | DHX9        | 19     | 21    | RPS3        |
| 5       | 5     | CHAF1B      | 26     | 35    | DDX17       | 20     | 22    | PCCB        | 19     | 21    | DDB1        |
| 4       | 7     | HIST3H3     | 26     | 31    | SMARCAL1    | 19     | 22    | RFC1        | 16     | 20    | USP9X       |
| 4       | 5     | SSBP1       | 26     | 29    | HADHA       | 18     | 23    | BCLAF1      | 18     | 19    | AHCYL1      |
| 4       | 5     | TTF2        | 25     | 52    | RPL3        | 17     | 21    | IMPDH2      | 18     | 19    | SSRP1       |
| 4       | 4     | CREB1       | 25     | 47    | SERBP1      | 16     | 29    | RPS4X       | 17     | 19    | DNAJC7      |
| 4       | 4     | MCM7        | 25     | 44    | RPS3A       | 16     | 18    | XRCC1       | 18     | 18    | PRMT5       |
| 4       | 4     | UBA52       | 23     | 69    | RPS3        | 15     | 27    | RPS3        | 17     | 18    | HLTF        |
| 4       | 4     | EEF1A1      | 23     | 35    | TOP1        | 15     | 24    | DBT         | 16     | 18    | PPP2R2A     |
| 4       | 4     | HSPA2       | 23     | 32    | PARP2       | 15     | 24    | RPL3        | 17     | 17    | LIG3        |
| 4       | 4     | POLR3B      | 23     | 31    | RCC2        | 14     | 15    | RPL7        | 13     | 17    | EEF1A1      |
| 4       | 4     | HIST1H2AA   | 23     | 30    | DDX21       | 14     | 14    | RFC4        | 15     | 16    | HSP90AA1    |

|   |   |           |    |    |         |    |    |          |    |    |           |
|---|---|-----------|----|----|---------|----|----|----------|----|----|-----------|
| 4 | 4 | RPA2      | 22 | 45 | EEF1A1  | 14 | 14 | DDX21    | 15 | 16 | STIP1     |
| 4 | 4 | POLR3F    | 22 | 28 | AIFM1   | 14 | 14 | HNRNPM   | 14 | 16 | CCT2      |
| 3 | 4 | HSPD1     | 22 | 26 | RFC1    | 13 | 25 | NPM1     | 15 | 15 | RPA1      |
| 3 | 4 | HOXA10    | 22 | 26 | SYNCRIP | 13 | 14 | PNKP     | 15 | 15 | CHFR      |
| 3 | 4 | XRCC4     | 22 | 24 | TOP2A   | 13 | 14 | RPL4     | 15 | 15 | TUFM      |
| 3 | 4 | ATF2      | 22 | 22 | IQGAP1  | 13 | 13 | ILF2     | 14 | 15 | CHD1L     |
| 3 | 4 | HNRNPC    | 21 | 33 | DDX5    | 13 | 13 | RFC2     | 14 | 14 | TCP1      |
| 3 | 3 | TFCP2     | 21 | 31 | DDX3Y   | 13 | 13 | RPS9     | 14 | 14 | STRAP     |
| 3 | 3 | JUN       | 21 | 23 | RTCB    | 12 | 14 | KPNA2    | 13 | 14 | TMPO      |
| 3 | 3 | HNRNPH1   | 21 | 22 | UBTF    | 12 | 14 | HSPA8    | 13 | 14 | HNRNPU    |
| 3 | 3 | RBBP4     | 20 | 23 | DHX15   | 12 | 13 | FBXO18   | 13 | 13 | CAD       |
| 3 | 3 | ZNF148    | 20 | 21 | CDC5L   | 12 | 12 | SYNCRIP  | 11 | 13 | STUB1     |
| 3 | 3 | CDSN      | 20 | 21 | MYBBP1A | 12 | 12 | DDX5     | 11 | 13 | HSPA4L    |
| 3 | 3 | ENO1      | 19 | 22 | DDX1    | 11 | 68 | RPA2     | 11 | 13 | HSP90AB3P |
| 3 | 3 | SLC25A5   | 19 | 22 | ATAD3A  | 11 | 12 | RFC5     | 12 | 12 | CTPS1     |
| 3 | 3 | SEMG2     | 19 | 21 | ABCF1   | 11 | 11 | AMOT     | 12 | 12 | USP7      |
| 3 | 3 | ATF1      | 19 | 20 | WRN     | 10 | 13 | RPS2     | 12 | 12 | RPS4X     |
| 3 | 3 | VIM       | 18 | 39 | RPS9    | 10 | 13 | RPS6     | 11 | 12 | TOPBP1    |
| 3 | 3 | TUBB1     | 18 | 25 | HSPA8   | 10 | 12 | RPL7A    | 9  | 12 | HIST1H4A  |
| 3 | 3 | HIST1H2AB | 18 | 21 | TSR1    | 10 | 10 | HSPA1A   | 9  | 12 | GRWD1     |
| 3 | 3 | TUBB3     | 18 | 21 | POP1    | 10 | 10 | IGF2BP1  | 11 | 11 | PARP2     |
| 3 | 3 | RCC1      | 18 | 19 | ZC3HAV1 | 9  | 26 | HIST1H4A | 9  | 11 | HSP90AB1  |
| 3 | 3 | ILF2      | 17 | 34 | RPS6    | 9  | 23 | RPA3     | 10 | 10 | ACTA2     |
| 3 | 3 | IGHA1     | 17 | 24 | RPL7    | 9  | 15 | RPL13    | 9  | 10 | NUP155    |
| 3 | 3 | RUVBL2    | 17 | 21 | ILF3    | 9  | 13 | RPS3A    | 6  | 10 | NPM1      |
| 3 | 3 | HADHA     | 17 | 18 | DHX36   | 9  | 11 | HSPA1L   | 5  | 10 | TMPO      |
| 3 | 3 | PRDX1     | 16 | 44 | NPM1    | 9  | 11 | RPS18    | 9  | 9  | PPP6R3    |
| 3 | 3 | CKAP4     | 16 | 36 | RPL23   | 9  | 11 | NOLC1    | 9  | 9  | PCBP1     |
| 3 | 3 | RUVBL1    | 16 | 26 | XRCC1   | 9  | 10 | TUBB2A   | 9  | 9  | PAICS     |
|   |   |           | 16 | 19 | STAU1   | 9  | 10 | CSNK2A1  | 9  | 9  | XRCC1     |
|   |   |           | 16 | 18 | GNL3    | 9  | 10 | RPL8     | 9  | 9  | RPS9      |
|   |   |           | 16 | 18 | IRS4    | 9  | 9  | MYBBP1A  | 8  | 9  | HBB       |
|   |   |           | 15 | 22 | RPS19   | 9  | 9  | RPL6     | 8  | 9  | PCMT1     |
|   |   |           | 15 | 17 | MAP4    | 8  | 10 | RPS15A   | 8  | 9  | RCC2      |
|   |   |           | 15 | 16 | DHX29   | 8  | 9  | RPL9     | 8  | 9  | BUB3      |
|   |   |           | 15 | 16 | PTCD3   | 8  | 9  | CETN2    | 8  | 9  | HSP90AB2P |
|   |   |           | 14 | 28 | RPS18   | 8  | 9  | TERF1    | 7  | 9  | PLS3      |
|   |   |           | 14 | 28 | PTBP1   | 8  | 9  | RPS7     | 5  | 9  | TUBB3     |
|   |   |           | 14 | 25 | RPL7A   | 8  | 9  | POLR3A   | 8  | 8  | MAPK1     |
|   |   |           | 14 | 20 | PRPF19  | 8  | 9  | HSPA9    | 8  | 8  | AIFM1     |
|   |   |           | 14 | 19 | ILF2    | 8  | 8  | CHTF18   | 8  | 8  | EIF4A1    |
|   |   |           | 14 | 19 | RPL13   | 8  | 8  | TUBA1A   | 8  | 8  | FASN      |
|   |   |           | 14 | 17 | G3BP1   | 8  | 8  | SMARCAL1 | 8  | 8  | PRDX2     |

|  |    |    |         |   |     |           |   |   |           |
|--|----|----|---------|---|-----|-----------|---|---|-----------|
|  | 14 | 16 | IGF2BP1 | 8 | 8   | RFC3      | 8 | 8 | MSH2      |
|  | 14 | 15 | EXOSC10 | 8 | 8   | ILF3      | 8 | 8 | GART      |
|  | 14 | 15 | ASCC3   | 8 | 8   | RPL15     | 8 | 8 | RPL4      |
|  | 13 | 28 | TMPO    | 8 | 8   | RPL26L1   | 7 | 8 | CAPZA1    |
|  | 13 | 18 | RPL23A  | 7 | 10  | YBX1      | 7 | 8 | ENO1      |
|  | 13 | 18 | RPL6    | 7 | 8   | SFPQ      | 7 | 8 | RPS3A     |
|  | 13 | 17 | SRPK1   | 7 | 7   | APTX      | 7 | 8 | HSPA2     |
|  | 13 | 16 | RPL26L1 | 7 | 7   | TXNRD1    | 7 | 8 | CDK5      |
|  | 13 | 15 | LEMD2   | 7 | 7   | GNL3      | 6 | 8 | GPX4      |
|  | 13 | 14 | DHX57   | 7 | 7   | RPS16     | 5 | 8 | HIST1H2BB |
|  | 13 | 14 | PNKP    | 7 | 7   | RPS17L    | 5 | 8 | RPA2      |
|  | 13 | 14 | HADHB   | 6 | 198 |           | 4 | 8 | TUBB1     |
|  | 13 | 13 | GNL2    | 6 | 24  | HIST1H2BB | 7 | 7 | VPS35     |
|  | 13 | 13 | CSDE1   | 6 | 8   | TDP1      | 7 | 7 | UBA1      |
|  | 13 | 13 | RRP1B   | 6 | 7   | SSBP1     | 7 | 7 | HNRNPH1   |
|  | 12 | 24 | RPA2    | 6 | 7   | DDX17     | 7 | 7 | BAG5      |
|  | 12 | 23 | RPLP0P6 | 6 | 7   | RPS8      | 7 | 7 | EEF1G     |
|  | 12 | 17 | HNRNPK  | 6 | 7   | RPL31     | 7 | 7 | CCT3      |
|  | 12 | 15 | POLRMT  | 6 | 7   | FEN1      | 7 | 7 | DDX1      |
|  | 12 | 15 | RPS7    | 6 | 6   | CDC73     | 7 | 7 | CPNE3     |
|  | 12 | 14 | MRPS27  | 6 | 6   | RAD23B    | 7 | 7 | MAPK3     |
|  | 12 | 13 | MRPS22  | 6 | 6   | RPS19     | 6 | 7 | LRRC47    |
|  | 12 | 12 | CKAP4   | 6 | 6   | RPS13     | 6 | 7 | RPS13     |
|  | 12 | 12 | EMD     | 6 | 6   | PRMT1     | 6 | 7 | PRPSAP2   |
|  | 12 | 12 | CCDC82  | 6 | 6   | TOP1      | 6 | 7 | AHCY      |
|  | 12 | 12 | XRN1    | 5 | 8   | RPL17     | 6 | 7 | GMPS      |
|  | 11 | 25 | RPS16   | 5 | 7   | RPS14     | 6 | 7 | GARS      |
|  | 11 | 24 | RPS14   | 5 | 7   | RPL23     | 6 | 7 | RPS18     |
|  | 11 | 24 | RPS2    | 5 | 7   | HIST3H3   | 5 | 7 | ACTB      |
|  | 11 | 22 | RPS13   | 5 | 6   | RPLP0     | 5 | 7 | YWHAQ     |
|  | 11 | 20 | RPS17L  | 5 | 6   | FEM1B     | 5 | 7 | TUBB      |
|  | 11 | 20 | RPL18A  | 5 | 6   | NAT10     | 5 | 7 | RPS2      |
|  | 11 | 16 | TUBB2A  | 5 | 6   | POLDIP3   | 6 | 6 | HNRNPK    |
|  | 11 | 16 | HSPA1L  | 5 | 6   | HNRNPAB   | 6 | 6 | IMPDH2    |
|  | 11 | 15 | HNRNPD  | 5 | 6   | RPL23A    | 6 | 6 | PPP2CA    |
|  | 11 | 15 | HSPA1A  | 5 | 6   | PRPF19    | 6 | 6 | JMJD4     |
|  | 11 | 15 | LMNA    | 5 | 5   | RPLP2     | 6 | 6 | DNAJA1    |
|  | 11 | 15 | RPS15A  | 5 | 5   | CSNK2A2   | 6 | 6 | RUVBL1    |
|  | 11 | 14 | RFC2    | 5 | 5   | CAPRIN1   | 6 | 6 | RNH1      |
|  | 11 | 14 | UPF3B   | 5 | 5   | TIMELESS  | 6 | 6 | CACYBP    |
|  | 11 | 14 | CAPRIN1 | 5 | 5   | GTF2I     | 6 | 6 | AHCYL2    |
|  | 11 | 14 | ABCF2   | 5 | 5   | RPL18     | 6 | 6 | IRS4      |
|  | 11 | 13 | IMPDH2  | 5 | 5   | CUL2      | 6 | 6 | MCMBP     |

|    |    |          |   |   |           |   |   |          |
|----|----|----------|---|---|-----------|---|---|----------|
| 11 | 13 | EIF5B    | 5 | 5 | SLC25A4   | 6 | 6 | NCL      |
| 11 | 13 | HNRNPR   | 5 | 5 | KIAA0101  | 6 | 6 | RPS16    |
| 11 | 12 | NOP58    | 5 | 5 | DHX15     | 6 | 6 | KEAP1    |
| 11 | 12 | DRG1     | 5 | 5 | CDC5L     | 6 | 6 | RPL7     |
| 11 | 12 | EIF2AK2  | 5 | 5 | RPS11     | 6 | 6 | RPL3     |
| 11 | 12 | STRAP    | 5 | 5 | RPLP0P6   | 5 | 6 | PPM1G    |
| 11 | 12 | RPL5     | 5 | 5 | RPL35     | 5 | 6 | DHX15    |
| 11 | 11 | HSPA9    | 5 | 5 | RPL10A    | 5 | 6 | CHEK1    |
| 11 | 11 | MTDH     | 4 | 6 | RPL13AP3  | 5 | 6 | CFL1     |
| 11 | 11 | MRPS35   | 4 | 5 | RPS15     | 5 | 6 | PLCG1    |
| 11 | 11 | LIG4     | 4 | 5 | RPL24     | 3 | 6 | DNAJA2   |
| 11 | 11 | CKAP2    | 4 | 5 | DDB1      | 5 | 5 | RPLP0    |
| 11 | 11 | TFB1M    | 4 | 4 | HNRNPU    | 5 | 5 | HSD17B10 |
| 10 | 18 | NHEJ1    | 4 | 4 | POLR1C    | 5 | 5 | FKBP5    |
| 10 | 15 | DAP3     | 4 | 4 | HNRNPR    | 5 | 5 | WDR77    |
| 10 | 14 | NSUN2    | 4 | 4 | HNRNPA1   | 5 | 5 | NAGK     |
| 10 | 13 | PRRC2A   | 4 | 4 | HNRNPA1L2 | 5 | 5 | HAT1     |
| 10 | 12 | TUBA1A   | 4 | 4 | EIF2S3L   | 5 | 5 | TUBB4A   |
| 10 | 12 | RFC5     | 4 | 4 | SKP1      | 5 | 5 | TXN      |
| 10 | 12 | NONO     | 4 | 4 | PURA      | 5 | 5 | KPNA2    |
| 10 | 11 | SART1    | 4 | 4 | RPL12     | 5 | 5 | THNSL1   |
| 10 | 11 | PIP5K1A  | 4 | 4 | RNF187    | 5 | 5 | RPLP0P6  |
| 10 | 11 | ZC3H15   | 4 | 4 | APLF      | 5 | 5 | SLC25A4  |
| 10 | 11 | DEK      | 4 | 4 | TRIM28    | 5 | 5 | MSH3     |
| 10 | 11 | LARP1    | 4 | 4 | HIST1H1C  | 5 | 5 | MCCC1    |
| 10 | 11 | KIF2A    | 4 | 4 | MRPS27    | 5 | 5 | AASDHPPT |
| 10 | 11 | DDX41    | 4 | 4 | LYAR      | 5 | 5 | PRPS1    |
| 10 | 11 | EPRS     | 4 | 4 | HP1BP3    | 5 | 5 | FLAD1    |
| 10 | 10 | NAT10    | 4 | 4 | RPS23     | 5 | 5 | RPL10A   |
| 10 | 10 | SRP68    | 4 | 4 | IRS4      | 5 | 5 | EIF5A    |
| 10 | 10 | TDP1     | 4 | 4 | RPL30     | 5 | 5 | RPS7     |
| 10 | 10 | LRRC47   | 4 | 4 | PPM1G     | 5 | 5 | DHX9     |
| 10 | 10 | AP1B1    | 4 | 4 | RPS25     | 5 | 5 | BAG2     |
| 10 | 10 | MINA     | 4 | 4 | POLB      | 5 | 5 | DDX17    |
| 10 | 10 | MOGS     | 4 | 4 | ZC3HAV1   | 5 | 5 | TTC4     |
| 10 | 10 | LTV1     | 4 | 4 | CUL1      | 5 | 5 | RPS11    |
| 10 | 10 | CDC73    | 3 | 8 | RPS24     | 4 | 5 | CDK4     |
| 10 | 10 | LRPPRC   | 3 | 6 | HIST1H2AA | 4 | 5 | HSPBP1   |
| 9  | 36 | HIST1H4A | 3 | 4 | RBM39     | 4 | 5 | GNB1L    |
| 9  | 22 | RPL31    | 3 | 4 | POLR3C    | 4 | 4 | YBX1     |
| 9  | 16 | RPL18    | 3 | 4 | RPL19     | 4 | 4 | PAXIP1   |
| 9  | 15 | YBX1     | 3 | 4 | DDX47     | 4 | 4 | SF3B3    |
| 9  | 13 | RPS15    | 3 | 4 | UBA52     | 4 | 4 | HNRNPF   |

|  |   |    |          |   |   |           |   |   |          |
|--|---|----|----------|---|---|-----------|---|---|----------|
|  | 9 | 12 | AP2B1    | 3 | 4 | RPL11     | 4 | 4 | RUVBL2   |
|  | 9 | 12 | DHX37    | 3 | 4 | POLR3B    | 4 | 4 | PFAS     |
|  | 9 | 12 | EIF2S2   | 3 | 4 | FUS       | 4 | 4 | EMD      |
|  | 9 | 11 | HSD17B4  | 3 | 4 | RPL27A    | 4 | 4 | CAPZB    |
|  | 9 | 11 | GRWD1    | 3 | 4 | RPL10     | 4 | 4 | RPS8     |
|  | 9 | 11 | GNL3L    | 3 | 4 | HNRNPA2B1 | 4 | 4 | ILF3     |
|  | 9 | 11 | ARHGEF2  | 3 | 3 | RPL22     | 4 | 4 | RPL23A   |
|  | 9 | 11 | AP2M1    | 3 | 3 | DHX30     | 4 | 4 | CCT4     |
|  | 9 | 10 | HNRNPF   | 3 | 3 | GRWD1     | 4 | 4 | HBA1     |
|  | 9 | 10 | RPL10A   | 3 | 3 | DDX3X     | 4 | 4 | SLC25A13 |
|  | 9 | 10 | RPL15    | 3 | 3 | DDX50     | 4 | 4 | MCM5     |
|  | 9 | 9  | KPNA2    | 3 | 3 | NOP2      | 4 | 4 | AHSA1    |
|  | 9 | 9  | IARS     | 3 | 3 | PSIP1     | 4 | 4 | HPRT1    |
|  | 9 | 9  | ASPH     | 3 | 3 | SLC25A5   | 4 | 4 | MIB2     |
|  | 9 | 9  | RARS     | 3 | 3 | GTPBP4    | 4 | 4 | RPS6     |
|  | 9 | 9  | EEF2     | 3 | 3 | HNRNPA0   | 4 | 4 | PPP5C    |
|  | 9 | 9  | HSPD1    | 3 | 3 | NONO      | 4 | 4 | CRKL     |
|  | 9 | 9  | DNMT1    | 3 | 3 | RRP1B     | 4 | 4 | MCM3     |
|  | 9 | 9  | EIF2S1   | 3 | 3 | MTDH      | 4 | 4 | WDR48    |
|  | 9 | 9  | PRPF31   | 3 | 3 | PNO1      | 4 | 4 | USP11    |
|  | 9 | 9  | DKC1     | 3 | 3 | RPL14     | 4 | 4 | IPO4     |
|  | 9 | 9  | DDX18    | 3 | 3 | DKC1      | 4 | 4 | THOC3    |
|  | 9 | 9  | PRDX1    | 3 | 3 | HSPA2     | 4 | 4 | WRNIP1   |
|  | 8 | 14 | HNRNPH1  | 3 | 3 | IPO9      | 4 | 4 | MCCC2    |
|  | 8 | 14 | PA2G4    | 3 | 3 | HSPA5     | 4 | 4 | PRPF19   |
|  | 8 | 12 | DNAJA2   | 3 | 3 | ERH       | 4 | 4 | DDX5     |
|  | 8 | 11 | HNRNPAB  | 3 | 3 | POLR3E    | 4 | 4 | RPS19    |
|  | 8 | 11 | KRR1     | 3 | 3 | RPL34     | 4 | 4 | RPL13    |
|  | 8 | 10 | SMC3     | 3 | 3 | TUBB3     | 4 | 4 | GRB2     |
|  | 8 | 10 | APTX     | 3 | 3 | RPS26P11  | 3 | 4 | TUBB6    |
|  | 8 | 10 | RPL8     | 3 | 3 | RPL18A    | 3 | 4 | SERBP1   |
|  | 8 | 9  | SARS2    | 3 | 3 | CHFR      | 3 | 4 | DDX3X    |
|  | 8 | 9  | TRMT6    | 3 | 3 | RPL28     | 3 | 4 | TARDBP   |
|  | 8 | 9  | DNAJC2   | 3 | 3 | RPL13A    | 3 | 4 | PCBP2    |
|  | 8 | 9  | FBXO18   | 3 | 3 | RPL5      | 3 | 4 | PRPSAP1  |
|  | 8 | 9  | TIMELESS |   |   |           | 3 | 4 | MPO      |
|  | 8 | 9  | HMMR     |   |   |           | 2 | 4 | CAPZA2   |
|  | 8 | 9  | NUSAP1   |   |   |           | 2 | 4 | HSP90AA2 |
|  | 8 | 9  | RNMTL1   |   |   |           | 3 | 3 | RCN2     |
|  | 8 | 9  | RPL28    |   |   |           | 3 | 3 | FKBP8    |
|  | 8 | 8  | DNAJA1   |   |   |           | 3 | 3 | FBXO22   |
|  | 8 | 8  | SND1     |   |   |           | 3 | 3 | RPL18    |
|  | 8 | 8  | POLB     |   |   |           | 3 | 3 | IGF2BP1  |



|   |    |         |   |   |           |
|---|----|---------|---|---|-----------|
| 8 | 8  | TUFM    | 3 | 3 | ILF2      |
| 8 | 8  | NOP56   | 3 | 3 | MRPS27    |
| 8 | 8  | HSPA5   | 3 | 3 | RPS14     |
| 8 | 8  | MARK2   | 3 | 3 | RPL12     |
| 8 | 8  | MSH3    | 3 | 3 | CSK       |
| 8 | 8  | NOP14   | 3 | 3 | HNRNPM    |
| 8 | 8  | AP2A1   | 3 | 3 | DHPS      |
| 8 | 8  | BYSL    | 3 | 3 | LRRC1     |
| 8 | 8  | POLDIP3 | 3 | 3 | RPL11     |
| 8 | 8  | SRPR    | 3 | 3 | OLA1      |
| 8 | 8  | DDX50   | 3 | 3 | KPNB1     |
| 8 | 8  | BLM     | 3 | 3 | HSP90AA5P |
| 8 | 8  | RPS11   | 3 | 3 | SLC25A5   |
| 7 | 28 | RPS24   | 3 | 3 | USP47     |
| 7 | 24 | RPL24   | 3 | 3 | RPL31     |
| 7 | 16 | RPL17   | 3 | 3 | RPS24     |
| 7 | 16 | RPL19   | 3 | 3 | CPOX      |
| 7 | 15 | RPL10   | 3 | 3 | PEX7      |
| 7 | 12 | RPS8    | 3 | 3 | PMPCA     |
| 7 | 10 | U2AF2   | 3 | 3 | CCT8      |
| 7 | 10 | TRIM28  | 3 | 3 | RPS20     |
| 7 | 10 | ZNF598  | 3 | 3 | MCM7      |
| 7 | 10 | RPLP0   | 3 | 3 | HIST1H2AA |
| 7 | 10 | RPL21   | 3 | 3 | LTF       |
| 7 | 10 | RPS10P5 | 3 | 3 | KPNA1     |
| 7 | 10 | SLC25A4 | 3 | 3 | SYNCRIP   |
| 7 | 9  | CHFR    | 3 | 3 | MAPK14    |
| 7 | 9  | FAM98A  | 3 | 3 | RPL23     |
| 7 | 9  | RRBP1   | 3 | 3 | ATP5B     |
| 7 | 9  | RBM39   | 3 | 3 | ATP1A1    |
| 7 | 9  | DDX49   | 3 | 3 | IARS      |
| 7 | 9  | RECQL   | 3 | 3 | BPIFB1    |
| 7 | 9  | MRPS5   | 3 | 3 | PPIA      |
| 7 | 9  | RPL13A  | 3 | 3 | RPS25     |
| 7 | 8  | GTPBP1  | 3 | 3 | LCMT2     |
| 7 | 8  | TRIM25  | 3 | 3 | RPL17     |
| 7 | 8  | PARG    | 3 | 3 | PHGDH     |
| 7 | 8  | EIF2D   | 3 | 3 | ELP2      |
| 7 | 8  | RPL9    | 3 | 3 | RBBP4     |
| 7 | 8  | USP10   | 3 | 3 | SLC25A3   |
| 7 | 8  | ACTA2   | 3 | 3 | DCAF16    |
| 7 | 8  | PRPF3   | 3 | 3 | CYFIP1    |
| 7 | 8  | CLPB    | 3 | 3 | FTO       |

|  |   |    |           |  |   |   |          |
|--|---|----|-----------|--|---|---|----------|
|  | 7 | 8  | GMD5      |  | 3 | 3 | RPL6     |
|  | 7 | 8  | RPL32     |  | 3 | 3 | TBCB     |
|  | 7 | 8  | RSBN1L    |  | 3 | 3 | RPL7A    |
|  | 7 | 8  | RPL35     |  | 3 | 3 | EPRS     |
|  | 7 | 7  | SLIT2     |  | 3 | 3 | RPL27    |
|  | 7 | 7  | ZNF281    |  | 3 | 3 | SMARCAL1 |
|  | 7 | 7  | LEMD3     |  | 3 | 3 | RPL13A   |
|  | 7 | 7  | MRPS31    |  | 3 | 3 | PABPC1   |
|  | 7 | 7  | PLRG1     |  | 3 | 3 | HIST3H3  |
|  | 7 | 7  | RFC4      |  | 3 | 3 | WRN      |
|  | 7 | 7  | G3BP2     |  | 3 | 3 | ATAD3A   |
|  | 7 | 7  | GTSE1     |  | 3 | 3 | RPL35A   |
|  | 7 | 7  | MAPK1     |  |   |   |          |
|  | 7 | 7  | HSPA14    |  |   |   |          |
|  | 7 | 7  | NSUN5     |  |   |   |          |
|  | 7 | 7  | NOA1      |  |   |   |          |
|  | 7 | 7  | UHRF1     |  |   |   |          |
|  | 7 | 7  | DDX54     |  |   |   |          |
|  | 7 | 7  | TBL2      |  |   |   |          |
|  | 7 | 7  | BRIX1     |  |   |   |          |
|  | 7 | 7  | DDX47     |  |   |   |          |
|  | 7 | 7  | DARS      |  |   |   |          |
|  | 7 | 7  | HP1BP3    |  |   |   |          |
|  | 7 | 7  | PRC1      |  |   |   |          |
|  | 7 | 7  | NOC4L     |  |   |   |          |
|  | 7 | 7  | EIF2S3L   |  |   |   |          |
|  | 7 | 7  | XRCC4     |  |   |   |          |
|  | 7 | 7  | RSL1D1    |  |   |   |          |
|  | 7 | 7  | PES1      |  |   |   |          |
|  | 6 | 42 | HIST1H2BB |  |   |   |          |
|  | 6 | 14 | BANF1     |  |   |   |          |
|  | 6 | 14 | RPA3      |  |   |   |          |
|  | 6 | 11 | DDX3X     |  |   |   |          |
|  | 6 | 9  | HNRNPA0   |  |   |   |          |
|  | 6 | 9  | HNRNPA1L2 |  |   |   |          |
|  | 6 | 9  | RPL12     |  |   |   |          |
|  | 6 | 9  | RPL36A    |  |   |   |          |
|  | 6 | 8  | RPL14     |  |   |   |          |
|  | 6 | 7  | FAM98B    |  |   |   |          |
|  | 6 | 7  | SUN2      |  |   |   |          |
|  | 6 | 7  | DDX55     |  |   |   |          |
|  | 6 | 7  | MSH2      |  |   |   |          |
|  | 6 | 7  | SMC1A     |  |   |   |          |

|  |   |    |           |  |  |
|--|---|----|-----------|--|--|
|  | 6 | 7  | SRPK2     |  |  |
|  | 6 | 7  | MTHFD1L   |  |  |
|  | 6 | 7  | MRPS18B   |  |  |
|  | 6 | 7  | EIF2A     |  |  |
|  | 6 | 7  | MTPAP     |  |  |
|  | 6 | 7  | SNW1      |  |  |
|  | 6 | 7  | CC2D1A    |  |  |
|  | 6 | 7  | MRPS34    |  |  |
|  | 6 | 6  | CHTF18    |  |  |
|  | 6 | 6  | PEO1      |  |  |
|  | 6 | 6  | SSB       |  |  |
|  | 6 | 6  | UTP14A    |  |  |
|  | 6 | 6  | MAP7D1    |  |  |
|  | 6 | 6  | NOP2      |  |  |
|  | 6 | 6  | CLASP1    |  |  |
|  | 6 | 6  | PLK1      |  |  |
|  | 6 | 6  | RPP30     |  |  |
|  | 6 | 6  | PRPF4     |  |  |
|  | 6 | 6  | NEMF      |  |  |
|  | 6 | 6  | CNP       |  |  |
|  | 6 | 6  | LYAR      |  |  |
|  | 6 | 6  | VRK1      |  |  |
|  | 6 | 6  | KIFC1     |  |  |
|  | 6 | 6  | SFPQ      |  |  |
|  | 6 | 6  | SLC25A13  |  |  |
|  | 6 | 6  | TPX2      |  |  |
|  | 6 | 6  | HNRNPA2B1 |  |  |
|  | 6 | 6  | PABPC1    |  |  |
|  | 6 | 6  | SKIV2L2   |  |  |
|  | 6 | 6  | RPS5      |  |  |
|  | 5 | 11 | RPL11     |  |  |
|  | 5 | 10 | RPLP2     |  |  |
|  | 5 | 10 | HNRNPH2   |  |  |
|  | 5 | 10 | RPL13AP3  |  |  |
|  | 5 | 8  | RPS23     |  |  |
|  | 5 | 7  | RPL30     |  |  |
|  | 5 | 7  | BOP1      |  |  |
|  | 5 | 7  | PWP1      |  |  |
|  | 5 | 7  | HIST1H1C  |  |  |
|  | 5 | 7  | RPS25     |  |  |
|  | 5 | 7  | RPL27     |  |  |
|  | 5 | 6  | DDX52     |  |  |
|  | 5 | 6  | TRIP12    |  |  |

|  |   |   |         |  |  |
|--|---|---|---------|--|--|
|  | 5 | 6 | IGF2BP2 |  |  |
|  | 5 | 6 | ADAR    |  |  |
|  | 5 | 6 | MARK3   |  |  |
|  | 5 | 6 | YTHDF2  |  |  |
|  | 5 | 6 | DDX24   |  |  |
|  | 5 | 6 | PPM1G   |  |  |
|  | 5 | 6 | AP2A2   |  |  |
|  | 5 | 6 | KRI1    |  |  |
|  | 5 | 6 | DDX28   |  |  |
|  | 5 | 6 | CDKAL1  |  |  |
|  | 5 | 6 | MARS    |  |  |
|  | 5 | 6 | SDAD1   |  |  |
|  | 5 | 6 | NOM1    |  |  |
|  | 5 | 6 | XRN2    |  |  |
|  | 5 | 6 | LRRC59  |  |  |
|  | 5 | 6 | RPL36   |  |  |
|  | 5 | 6 | FARSA   |  |  |
|  | 5 | 6 | RPL38   |  |  |
|  | 5 | 6 | RPL35A  |  |  |
|  | 5 | 5 | RPSA    |  |  |
|  | 5 | 5 | DDX6    |  |  |
|  | 5 | 5 | CSNK1D  |  |  |
|  | 5 | 5 | BMS1    |  |  |
|  | 5 | 5 | TCEB3   |  |  |
|  | 5 | 5 | FXR1    |  |  |
|  | 5 | 5 | VRK2    |  |  |
|  | 5 | 5 | NIFK    |  |  |
|  | 5 | 5 | HNRNPA3 |  |  |
|  | 5 | 5 | GRSF1   |  |  |
|  | 5 | 5 | MCM5    |  |  |
|  | 5 | 5 | THRAP3  |  |  |
|  | 5 | 5 | QARS    |  |  |
|  | 5 | 5 | NCAPG2  |  |  |
|  | 5 | 5 | CUL1    |  |  |
|  | 5 | 5 | SNRPA1  |  |  |
|  | 5 | 5 | HMCE5   |  |  |
|  | 5 | 5 | RBMX    |  |  |
|  | 5 | 5 | USP7    |  |  |
|  | 5 | 5 | GPATCH4 |  |  |
|  | 5 | 5 | DDX56   |  |  |
|  | 5 | 5 | IGHMBP2 |  |  |
|  | 5 | 5 | RRS1    |  |  |
|  | 5 | 5 | RFC3    |  |  |

|   |    |          |  |  |
|---|----|----------|--|--|
| 5 | 5  | TRMT2A   |  |  |
| 5 | 5  | SRSF5    |  |  |
| 5 | 5  | CMAS     |  |  |
| 5 | 5  | H1FX     |  |  |
| 5 | 5  | MRPS7    |  |  |
| 5 | 5  | FARSB    |  |  |
| 5 | 5  | FUS      |  |  |
| 5 | 5  | SMC2     |  |  |
| 5 | 5  | ASCC2    |  |  |
| 5 | 5  | AURKA    |  |  |
| 5 | 5  | ABCD3    |  |  |
| 5 | 5  | DIMT1    |  |  |
| 5 | 5  | FBL      |  |  |
| 5 | 5  | DNAJC9   |  |  |
| 5 | 5  | TOP1MT   |  |  |
| 5 | 5  | BCLAF1   |  |  |
| 4 | 12 | RPS26P11 |  |  |
| 4 | 11 | RPS10    |  |  |
| 4 | 8  | ACTB     |  |  |
| 4 | 7  | UBA52    |  |  |
| 4 | 7  | RPL10L   |  |  |
| 4 | 6  | MRPS23   |  |  |
| 4 | 6  | TECR     |  |  |
| 4 | 6  | RPL34    |  |  |
| 4 | 5  | EWSR1    |  |  |
| 4 | 5  | WDR6     |  |  |
| 4 | 5  | KIF23    |  |  |
| 4 | 5  | RNH1     |  |  |
| 4 | 5  | APLF     |  |  |
| 4 | 5  | SRP72    |  |  |
| 4 | 5  | HNRNPA1  |  |  |
| 4 | 5  | MRPS9    |  |  |
| 4 | 5  | MUS81    |  |  |
| 4 | 5  | PSIP1    |  |  |
| 4 | 5  | ESF1     |  |  |
| 4 | 5  | ZNF768   |  |  |
| 4 | 5  | SNRPD3   |  |  |
| 4 | 5  | WDR3     |  |  |
| 4 | 5  | RBM14    |  |  |
| 4 | 5  | SRSF3    |  |  |
| 4 | 5  | MPG      |  |  |
| 4 | 5  | HELLS    |  |  |
| 4 | 4  | LSM14B   |  |  |

|   |   |           |  |  |
|---|---|-----------|--|--|
| 4 | 4 | H2AFY     |  |  |
| 4 | 4 | FTSJ3     |  |  |
| 4 | 4 | C4orf27   |  |  |
| 4 | 4 | TBL3      |  |  |
| 4 | 4 | C14orf166 |  |  |
| 4 | 4 | TCP1      |  |  |
| 4 | 4 | RBM28     |  |  |
| 4 | 4 | GTPBP10   |  |  |
| 4 | 4 | ESPL1     |  |  |
| 4 | 4 | TMEM214   |  |  |
| 4 | 4 | TOP2B     |  |  |
| 4 | 4 | TXNRD1    |  |  |
| 4 | 4 | TUBB      |  |  |
| 4 | 4 | BUB3      |  |  |
| 4 | 4 | RRP7A     |  |  |
| 4 | 4 | RTCA      |  |  |
| 4 | 4 | HSPA2     |  |  |
| 4 | 4 | CFL1      |  |  |
| 4 | 4 | MRPS10    |  |  |
| 4 | 4 | SMU1      |  |  |
| 4 | 4 | RPN1      |  |  |
| 4 | 4 | KIF14     |  |  |
| 4 | 4 | RPL22     |  |  |
| 4 | 4 | WDR12     |  |  |
| 4 | 4 | VRK3      |  |  |
| 4 | 4 | SGPL1     |  |  |
| 4 | 4 | PCBP2     |  |  |
| 4 | 4 | IGF2BP3   |  |  |
| 4 | 4 | SMCHD1    |  |  |
| 4 | 4 | SLC25A3   |  |  |
| 4 | 4 | MYH9      |  |  |
| 4 | 4 | PRMT1     |  |  |
| 4 | 4 | KIF2C     |  |  |
| 4 | 4 | AP3D1     |  |  |
| 4 | 4 | LLGL1     |  |  |
| 4 | 4 | PTCD1     |  |  |
| 4 | 4 | SLC25A11  |  |  |
| 4 | 4 | DNAJA3    |  |  |
| 4 | 4 | LRWD1     |  |  |
| 4 | 4 | PTPLAD1   |  |  |
| 4 | 4 | SMARCA5   |  |  |
| 4 | 4 | CDC20     |  |  |
| 4 | 4 | TRMT10C   |  |  |

|   |   |           |  |  |
|---|---|-----------|--|--|
| 4 | 4 | DDX10     |  |  |
| 4 | 4 | THOC2     |  |  |
| 4 | 4 | KIN       |  |  |
| 4 | 4 | EIF4G1    |  |  |
| 4 | 4 | NXF1      |  |  |
| 4 | 4 | TFAM      |  |  |
| 4 | 4 | SPATA5L1  |  |  |
| 4 | 4 | NOB1      |  |  |
| 4 | 4 | RPP38     |  |  |
| 4 | 4 | AURKB     |  |  |
| 4 | 4 | TOE1      |  |  |
| 4 | 4 | HNRNPLL   |  |  |
| 4 | 4 | CLASP2    |  |  |
| 4 | 4 | RBBP4     |  |  |
| 4 | 4 | CPT1A     |  |  |
| 4 | 4 | SRSF4     |  |  |
| 4 | 4 | HIST3H3   |  |  |
| 3 | 9 | HIST1H1A  |  |  |
| 3 | 8 | HIST1H2AA |  |  |
| 3 | 7 | SSBP1     |  |  |
| 3 | 6 | RPS27L    |  |  |
| 3 | 6 | SLC25A5   |  |  |
| 3 | 6 | RBM42     |  |  |
| 3 | 6 | KARS      |  |  |
| 3 | 5 | YBX3      |  |  |
| 3 | 5 | EIF3D     |  |  |
| 3 | 5 | RPL3L     |  |  |
| 3 | 5 | RPS12     |  |  |
| 3 | 4 | HBS1L     |  |  |
| 3 | 4 | H2AFY2    |  |  |
| 3 | 4 | GTF3C2    |  |  |
| 3 | 4 | RIOK2     |  |  |
| 3 | 4 | TMA16     |  |  |
| 3 | 4 | RPS20     |  |  |
| 3 | 4 | SPATS2L   |  |  |
| 3 | 4 | ZC3H7B    |  |  |
| 3 | 4 | TARS2     |  |  |
| 3 | 4 | CCNB1     |  |  |
| 3 | 4 | EIF4A1    |  |  |
| 3 | 4 | MATR3     |  |  |
| 3 | 4 | AIMP2     |  |  |
| 3 | 4 | MCAT      |  |  |
| 3 | 4 | CAMSAP3   |  |  |

|  |   |   |           |  |  |
|--|---|---|-----------|--|--|
|  | 3 | 4 | RPL27A    |  |  |
|  | 3 | 4 | PPAN      |  |  |
|  | 3 | 4 | CEBPZ     |  |  |
|  | 3 | 4 | RPS28     |  |  |
|  | 3 | 4 | CBX4      |  |  |
|  | 3 | 4 | UPF2      |  |  |
|  | 3 | 4 | MORF4L1   |  |  |
|  | 3 | 4 | SRP14     |  |  |
|  | 3 | 4 | SNRPB     |  |  |
|  | 3 | 4 | HIST1H2BA |  |  |
|  | 3 | 3 | SRPRB     |  |  |
|  | 3 | 3 | ALKBH5    |  |  |
|  | 3 | 3 | PDS5A     |  |  |
|  | 3 | 3 | TARDBP    |  |  |
|  | 3 | 3 | DNA2      |  |  |
|  | 3 | 3 | PCBP1     |  |  |
|  | 3 | 3 | RRP1      |  |  |
|  | 3 | 3 | EFTUD2    |  |  |
|  | 3 | 3 | CIRBP     |  |  |
|  | 3 | 3 | NVL       |  |  |
|  | 3 | 3 | LUC7L2    |  |  |
|  | 3 | 3 | MCM3      |  |  |
|  | 3 | 3 | HERC5     |  |  |
|  | 3 | 3 | FAM120A   |  |  |
|  | 3 | 3 | NOP16     |  |  |
|  | 3 | 3 | DPM1      |  |  |
|  | 3 | 3 | LARS      |  |  |
|  | 3 | 3 | MPHOSPH10 |  |  |
|  | 3 | 3 | RRP12     |  |  |
|  | 3 | 3 | NACA      |  |  |
|  | 3 | 3 | TXLNA     |  |  |
|  | 3 | 3 | SLC16A1   |  |  |
|  | 3 | 3 | PKN3      |  |  |
|  | 3 | 3 | USP39     |  |  |
|  | 3 | 3 | PPIL2     |  |  |
|  | 3 | 3 | SF3B2     |  |  |
|  | 3 | 3 | ARHGAP19  |  |  |
|  | 3 | 3 | CCDC86    |  |  |
|  | 3 | 3 | TFCP2     |  |  |
|  | 3 | 3 | SLC25A1   |  |  |
|  | 3 | 3 | EIF5A     |  |  |
|  | 3 | 3 | HIRIP3    |  |  |
|  | 3 | 3 | CAMK2D    |  |  |



|  |   |   |          |  |  |
|--|---|---|----------|--|--|
|  | 3 | 3 | SNRNP200 |  |  |
|  | 3 | 3 | ATAD3B   |  |  |
|  | 3 | 3 | METAP2   |  |  |
|  | 3 | 3 | PPP1CA   |  |  |
|  | 3 | 3 | CWF19L1  |  |  |
|  | 3 | 3 | TRIM26   |  |  |
|  | 3 | 3 | STAU2    |  |  |
|  | 3 | 3 | HS2ST1   |  |  |
|  | 3 | 3 | GTF2B    |  |  |
|  | 3 | 3 | SRBD1    |  |  |
|  | 3 | 3 | YME1L1   |  |  |
|  | 3 | 3 | GRK6     |  |  |
|  | 3 | 3 | YTHDF1   |  |  |
|  | 3 | 3 | RSBN1    |  |  |
|  | 3 | 3 | U2SURP   |  |  |
|  | 3 | 3 | GPAM     |  |  |
|  | 3 | 3 | GTPBP6   |  |  |
|  | 3 | 3 | PRPSAP1  |  |  |
|  | 3 | 3 | MAP7D2   |  |  |
|  | 3 | 3 | RANBP6   |  |  |
|  | 3 | 3 | MMTAG2   |  |  |
|  | 3 | 3 | PHF6     |  |  |
|  | 3 | 3 | ASF1A    |  |  |
|  | 3 | 3 | EZR      |  |  |
|  | 3 | 3 | DLG3     |  |  |
|  | 3 | 3 | TOP3A    |  |  |
|  | 3 | 3 | PURA     |  |  |
|  | 3 | 3 | MRPS26   |  |  |
|  | 3 | 3 | EPB41L5  |  |  |
|  | 3 | 3 | SMC4     |  |  |
|  | 3 | 3 | ASTE1    |  |  |
|  | 3 | 3 | TCF25    |  |  |
|  | 3 | 3 | ZRANB2   |  |  |
|  | 3 | 3 | SMC5     |  |  |
|  | 3 | 3 | EXOSC7   |  |  |
|  | 3 | 3 | KCTD12   |  |  |
|  | 3 | 3 | KIAA0391 |  |  |
|  | 3 | 3 | LUZP1    |  |  |
|  | 3 | 3 | MCM10    |  |  |
|  | 3 | 3 | KIF4A    |  |  |
|  | 3 | 3 | NKRF     |  |  |
|  | 3 | 3 | HEATR3   |  |  |
|  | 3 | 3 | PAF1     |  |  |

|  |   |   |          |  |  |
|--|---|---|----------|--|--|
|  | 3 | 3 | RCC1     |  |  |
|  | 3 | 3 | BUD13    |  |  |
|  | 3 | 3 | EBNA1BP2 |  |  |
|  | 3 | 3 | SRSF7    |  |  |
|  | 3 | 3 | PRPF8    |  |  |
|  | 3 | 3 | KHDRBS1  |  |  |
|  | 3 | 3 | LARP7    |  |  |
|  | 3 | 3 | EEF1G    |  |  |
|  | 3 | 3 | MAP4K4   |  |  |
|  | 3 | 3 | LARP1B   |  |  |

**Supplemental Table S3. Primer sets for RT-qPCR.**

| Target          | Primers                           |
|-----------------|-----------------------------------|
| <i>tRNA-Ala</i> | F: 5'-GGGGGTGTAGCTCAGTGG-3'       |
|                 | R: 5'-TGGTGGAGGTGTCGGGGATC-3'     |
| <i>tRNA-Gly</i> | F: 5'-GCGTTGGTGGTATAGTGGT-3'      |
|                 | R: 5'-TGGTGC GTTGGCCGGAATCGA-3'   |
| <i>tRNA-His</i> | F: 5'-GGCCGTGATCGTATAGTG-3'       |
|                 | R: 5'-CGAACCGAGGTTGCTGCGG-3'      |
| <i>tRNA-Pro</i> | F: 5'-GGCTCGTTGGTCTAG-3'          |
|                 | R: 5'-TGGGGGCTCGTCCGGGATTTG-3'    |
| <i>tRNA-Leu</i> | F: 5'-GAGGACAACGGGGACAGTAA-3'     |
|                 | R: 5'-TCCACCAGAAAACTCCAGC-3'      |
| <i>U6 snRNA</i> | F: 5'-GCTTCGGCAGCACATATACTA-3'    |
|                 | R: 5'-CGAATTTGCGTGTCATCCTTG-3'    |
| <i>5S rRNA</i>  | F: 5'-TACGGCCATACCACCCTGAAC-3'    |
|                 | R: 5'-CGGTCTCCCATCCAAGTACTAACC-3' |
| <i>IFN-β</i>    | F: 5'-AGGACAGGATGAACTTTGAC-3'     |
|                 | R: 5'-TGATAGACATTAGCCAGGAG-3'     |
| <i>GAPDH</i>    | F: 5'-GCACCACCAACTGCTTA-3'        |
|                 | R: 5'-AGTAGAGGCAGGGATGA-3'        |
